# Supplementary material for: Ion-pairs as a gateway to transmetalation: aryl transfer from boron to nickel and magnesium
Source: Royal Society of Chemistry journal article supplement (doi:10.1039/d2dt00746k), 2022-01-01
Supplement: d2dt00746k1.pdf [file d2dt00746k1.pdf]

## Electronic Supplementary Information

### Ion-pairs as a Gateway to Transmetalation: Aryl Transfer from Boron to Nickel and Magnesium.

Kimberly C. Fabijanczuk,<sup>a</sup> Weam A. O. Altalhi,<sup>b,c</sup> Asma M. O. Aldajani,<sup>b,d</sup> Allan J. Canty,<sup>e</sup> Scott A. McLuckey<sup>\*,a</sup> and Richard A. J. O'Hair<sup>\*,b</sup>

a. Department of Chemistry, Purdue University, West Lafayette, Indiana 47907-2084, United States of America

b. School of Chemistry and Bio21 Institute of Molecular Science and Biotechnology, The University of Melbourne, Victoria 3010, Australia

c. Department of Chemistry, Prince Sattam Bin Abdulaziz University, Hotat Bani Tamim, 16511 Saudi Arabia

d. Department of Chemistry, College of Science, University of Bisha, Bisha 61922, P.O. Box 551, Saudi Arabia

e. School of Physical Sciences - Chemistry, University of Tasmania, Private Bag 75, Hobart, Tasmania 7001, Australia.

#### Contents of Supplementary Information

**Figure S1:** Mass spectra of magnesium hydrolysis reactions.

Cartesian coordinates and energies (in Hartrees) of all Ni and Mg species.

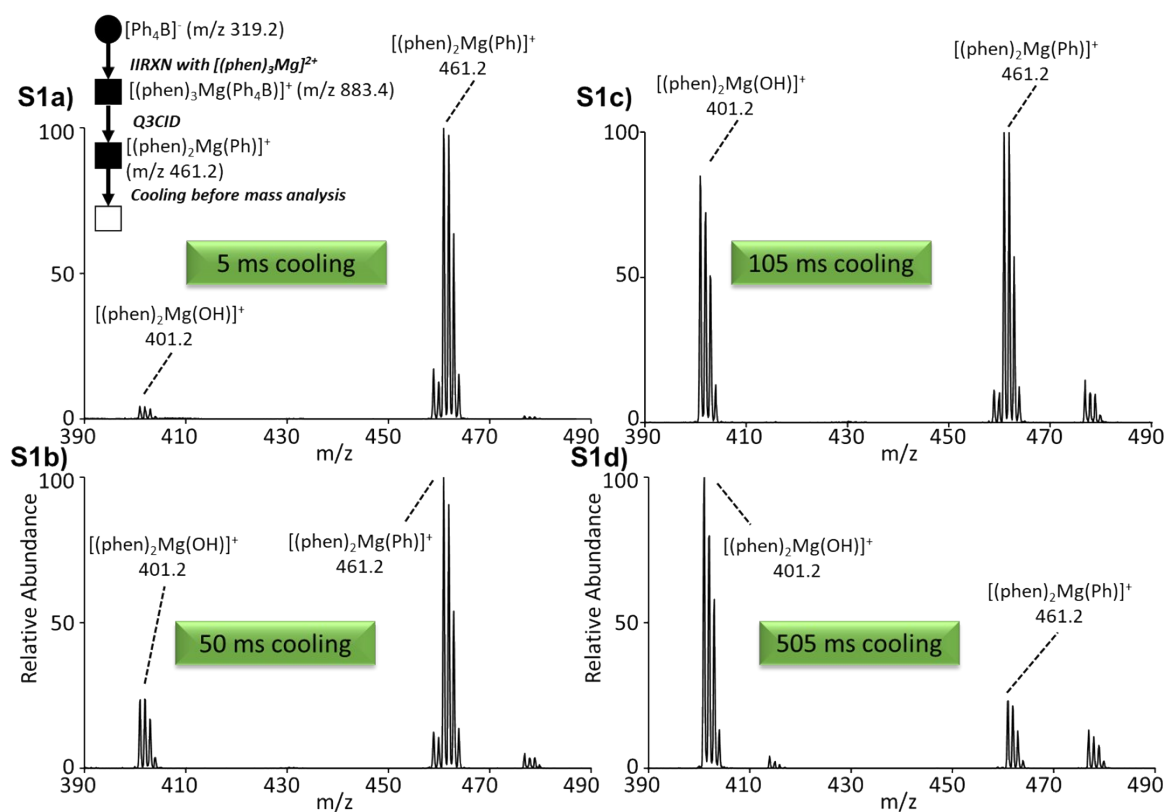

**Figure S1:** Mass spectra showing the reaction of mass-selected of  $[(\text{phen})_2\text{Mg}(\text{Ph})]^+$  ( $m/z$  461) reacting with background water yielding the hydroxide product  $[(\text{phen})_2\text{Mg}(\text{OH})]^+$  ( $m/z$  401) as a function of cooling time post isolation: **(a)** the mass spectrum for 5 ms of cooling time allowed after isolation of  $[(\text{phen})_2\text{Mg}(\text{Ph})]^+$  ( $m/z$  461) that is then immediately mass analysed; **(b)** the analogous spectrum for 50 ms cooling time; **(c)** the analogous spectrum for 105 ms of cooling time; and **(d)** the analogous spectrum for 505 ms of cooling time.

## Cartesian coordinates and energies (in Hartrees) of all Ni and Mg species.

3

Charge = -1 Multiplicity = 1  
 E= -950.450045  
 H= -950.428688  
 G= -950.500796  
 SPE= -951.9884227

|   |             |             |             |
|---|-------------|-------------|-------------|
| B | -0.00004800 | 0.00010900  | -0.00007600 |
| C | -0.99210100 | 1.01350300  | 0.83381200  |
| C | -0.98297500 | 1.18311100  | 2.22560300  |
| C | -1.97067300 | 1.74968000  | 0.13888500  |
| C | -1.87292500 | 2.03554400  | 2.88434800  |
| H | -0.25930300 | 0.62421500  | 2.82278700  |
| C | -2.86047500 | 2.60920300  | 0.77570600  |
| H | -2.03713800 | 1.63244900  | -0.94665100 |
| C | -2.81625900 | 2.75996600  | 2.16264500  |
| H | -1.82782600 | 2.12909800  | 3.97137200  |
| H | -3.59913500 | 3.15964500  | 0.18964500  |
| H | -3.51326600 | 3.42790800  | 2.67111700  |
| C | 0.99175300  | -0.83436400 | 1.01305300  |
| C | 0.98198300  | -2.22621600 | 1.18234200  |
| C | 1.97066400  | -0.14006300 | 1.74934700  |
| C | 1.87173200  | -2.88556500 | 2.03450700  |
| H | 0.25796700  | -2.82292300 | 0.62340400  |
| C | 2.86026400  | -0.77751000 | 2.60862300  |
| H | 2.03758700  | 0.94547700  | 1.63240100  |
| C | 2.81546700  | -2.16446300 | 2.75900600  |
| H | 1.82615800  | -3.97259200 | 2.12780400  |
| H | 3.59922200  | -0.19191900 | 3.15916700  |
| H | 3.51231700  | -2.67341100 | 3.42675000  |
| C | -0.99265700 | -1.01256000 | -0.83422300 |
| C | -1.97119200 | -1.74886100 | -0.13936900 |
| C | -0.98395000 | -1.18154400 | -2.22609800 |
| C | -2.86140700 | -2.60783600 | -0.77635400 |
| H | -2.03725500 | -1.63220000 | 0.94625300  |
| C | -1.87432800 | -2.03340000 | -2.88499900 |
| H | -0.26032600 | -0.62255900 | -2.82324500 |
| C | -2.81765900 | -2.75790900 | -2.16338100 |
| H | -3.60002000 | -3.15839300 | -0.19034000 |
| H | -1.82957400 | -2.12643200 | -3.97208100 |
| H | -3.51500300 | -3.42540600 | -2.67197600 |
| C | 0.99288700  | 0.83375100  | -1.01285400 |
| C | 0.98467700  | 2.22563400  | -1.18198000 |
| C | 1.97137400  | 0.13853200  | -1.74885100 |
| C | 1.87535900  | 2.88413300  | -2.03383200 |
| H | 0.26116900  | 2.82307200  | -0.62317700 |
| C | 2.86189100  | 0.77512100  | -2.60781800 |
| H | 2.03720900  | -0.94707500 | -1.63191300 |
| C | 2.81854600  | 2.16212400  | -2.75813800 |
| H | 1.83094800  | 3.97121700  | -2.12703000 |
| H | 3.60042900  | 0.18881200  | -3.15815900 |
| H | 3.51611800  | 2.67040600  | -3.42563700 |

4a

Charge = 2 Multiplicity = 3  
 E= -1883.742979  
 H= -1883.710381  
 G= -1883.806492  
 SPE= -3223.73426

|    |             |             |             |
|----|-------------|-------------|-------------|
| Ni | 0.00307000  | -0.00156500 | 0.00242200  |
| N  | 1.47714100  | -1.01657600 | 1.11482700  |
| N  | 1.72088200  | 0.48935000  | -1.11417200 |
| N  | 0.15494900  | 1.78856800  | 1.10446300  |
| N  | -1.29049200 | 1.23575600  | -1.10981500 |
| N  | -1.61947300 | -0.76048800 | 1.11683500  |
| N  | -0.42816500 | -1.74266600 | -1.10121400 |
| C  | -2.19539800 | -0.25778700 | 2.19987800  |
| H  | -1.77449900 | 0.67134900  | 2.58773400  |

|   |             |             |             |
|---|-------------|-------------|-------------|
| C | -2.23226500 | 4.78873600  | -0.56413600 |
| H | -2.86453800 | 5.55077600  | -1.01784400 |
| C | -0.66579700 | 4.07220200  | 1.14855400  |
| C | -1.49769100 | 5.06971900  | 0.54588100  |
| H | -1.53129700 | 6.06076000  | 0.99649100  |
| C | -3.65446200 | -3.82018700 | 0.55983100  |
| H | -4.49843700 | -4.33963300 | 1.01173100  |
| C | -1.99887900 | 0.94086900  | -2.19100000 |
| H | -1.89902000 | -0.07539700 | -2.57558900 |
| C | 1.33422700  | -1.75790300 | 2.20455800  |
| H | 0.32004600  | -1.85956500 | 2.59415700  |
| C | -3.19745800 | -2.60446100 | 1.16256000  |
| C | -3.04932100 | -4.31856100 | -0.55198200 |
| H | -3.39998300 | -5.24429200 | -1.00624300 |
| C | 0.87836100  | 2.04117500  | 2.18632200  |
| H | 1.47710500  | 1.21565300  | 2.57461900  |
| C | -1.46885100 | -2.43893900 | -0.58035800 |
| C | -2.10610700 | -1.91387200 | 0.59476300  |
| C | 1.81870900  | 1.23740300  | -2.20438200 |
| H | 0.88867600  | 1.65672700  | -2.59154400 |
| C | 0.17539600  | -2.21174000 | -2.18471900 |
| H | 1.00845400  | -1.62257700 | -2.57125300 |
| C | -2.19179300 | 3.48851500  | -1.16236300 |
| C | 4.12164800  | 0.13811100  | -1.16766400 |
| C | 2.71780100  | -0.85984900 | 0.58996700  |
| C | -1.94052500 | -3.63945700 | -1.15147200 |
| C | 3.86500400  | -1.44857800 | 1.16212800  |
| C | -1.37998500 | 2.48581300  | -0.59166000 |
| C | -0.60652100 | 2.78166200  | 0.58188200  |
| C | 5.14431400  | -1.23521500 | 0.55533000  |
| H | 6.01940200  | -1.69763900 | 1.01002700  |
| C | 2.84809600  | -0.05455200 | -0.59222800 |
| C | 5.26781400  | -0.47190100 | -0.56396900 |
| H | 6.24348100  | -0.31239800 | -1.02109500 |
| C | 0.11274300  | 4.30835600  | 2.30002000  |
| H | 0.09528100  | 5.29229700  | 2.76805200  |
| C | 0.88694200  | 3.29320700  | 2.81995500  |
| H | 1.49817600  | 3.44615000  | 3.70582900  |
| C | -2.93038900 | 3.14456500  | -2.31286100 |
| H | -3.57011400 | 3.89060700  | -2.78367000 |
| C | -2.83578200 | 1.86956000  | -2.82829200 |
| H | -3.39425300 | 1.57520700  | -3.71330300 |
| C | 3.68044100  | -2.22782800 | 2.32253000  |
| H | 4.54125000  | -2.69997800 | 2.79538000  |
| C | 2.41433500  | -2.38454700 | 2.84474500  |
| H | 2.24137100  | -2.98059700 | 3.73726000  |
| C | 4.19201900  | 0.93536100  | -2.32829300 |
| H | 5.15719900  | 1.10850800  | -2.80362300 |
| C | 3.04047100  | 1.48710000  | -2.84778200 |
| H | 3.06409800  | 2.10690000  | -3.74056800 |
| C | -0.22033900 | -3.39730400 | -2.82244800 |
| H | 0.30882100  | -3.73620400 | -3.70951900 |
| C | -1.28048900 | -4.11000500 | -2.30466900 |
| H | -1.61483700 | -5.03402800 | -2.77568100 |
| C | -3.78593100 | -2.04575300 | 2.31555600  |
| H | -4.63138400 | -2.54825700 | 2.78479800  |
| C | -3.28616800 | -0.87091800 | 2.83534300  |
| H | -3.71987700 | -0.41616700 | 3.72241600  |

4b

Charge = 2 Multiplicity = 1  
 E= -1912.927701  
 H= -1912.894932  
 G= -1912.991788  
 SPE= -1915.509983

|   |             |            |             |
|---|-------------|------------|-------------|
| H | -3.04074400 | 5.56134900 | -1.04520700 |
| C | -2.39460700 | 4.81800200 | -0.58154000 |
| C | -2.29636000 | 3.52662400 | -1.18804200 |
| C | -1.69658800 | 5.11157900 | 0.54535400  |

|    |             |             |             |
|----|-------------|-------------|-------------|
| C  | -1.46615900 | 2.54079500  | -0.61331200 |
| C  | -3.00014400 | 3.18160600  | -2.35827000 |
| C  | -0.85024300 | 4.13476300  | 1.15745200  |
| H  | -1.77001500 | 6.09576400  | 1.00472300  |
| N  | -1.32743400 | 1.30245300  | -1.15195900 |
| C  | -0.73433000 | 2.84868200  | 0.58816000  |
| C  | -2.85908900 | 1.92138900  | -2.89342600 |
| H  | -3.65062600 | 3.91862300  | -2.82744800 |
| C  | -0.11218600 | 4.39592700  | 2.32827500  |
| C  | -2.00757800 | 1.01144700  | -2.25349900 |
| N  | 0.04540800  | 1.88024800  | 1.13282400  |
| H  | -3.39026700 | 1.62600400  | -3.79387800 |
| C  | 0.68184300  | 3.41034700  | 2.86917100  |
| H  | -0.17818500 | 5.37866100  | 2.79337300  |
| H  | -1.87198400 | 0.00560800  | -2.65417400 |
| C  | 0.72905200  | 2.16235200  | 2.23463700  |
| H  | 1.26378900  | 3.58302100  | 3.77012600  |
| H  | 1.34642100  | 1.35903800  | 2.63975200  |
| Mg | 0.01363500  | -0.00511300 | 0.00411300  |
| C  | 3.12065500  | 1.44321600  | -2.92667400 |
| C  | 4.28055000  | 0.94023100  | -2.38247900 |
| C  | 4.22525000  | 0.18417800  | -1.19531000 |
| C  | 2.95618100  | -0.02175000 | -0.61361800 |
| C  | 1.90632100  | 1.18151400  | -2.27895100 |
| C  | 5.39023900  | -0.37047600 | -0.57852300 |
| C  | 2.85413300  | -0.78207300 | 0.60526000  |
| C  | 4.02325900  | -1.32012800 | 1.18404800  |
| C  | 5.29269400  | -1.09684900 | 0.56441100  |
| C  | 3.87710700  | -2.06374500 | 2.37139000  |
| H  | 4.75896400  | -2.49415800 | 2.84418400  |
| C  | 2.62620800  | -2.23833200 | 2.91851700  |
| C  | 1.52464600  | -1.66086500 | 2.27381800  |
| H  | 6.35748800  | -0.19864600 | -1.04751300 |
| H  | 3.13242400  | 2.03122900  | -3.84006300 |
| H  | 5.24430200  | 1.11932600  | -2.85740900 |
| H  | 0.96855000  | 1.56297000  | -2.68599100 |
| H  | 6.17992900  | -1.52096100 | 1.03132100  |
| H  | 2.48239800  | -2.80850500 | 3.83198200  |
| H  | 0.51997400  | -1.77748100 | 2.68322700  |
| N  | 1.62535800  | -0.95240600 | 1.15647400  |
| N  | 1.81643800  | 0.47161700  | -1.16163900 |
| C  | -3.26782600 | -1.08925300 | 2.91342400  |
| C  | -3.75517700 | -2.25500600 | 2.36772900  |
| C  | -3.17744900 | -2.77080000 | 1.19136000  |
| C  | -2.10680700 | -2.04951900 | 0.62153900  |
| C  | -2.19791100 | -0.44580100 | 2.27752800  |
| C  | -3.63275100 | -3.97831800 | 0.57508500  |
| C  | -1.49212600 | -2.53876500 | -0.58545700 |
| C  | -1.96157800 | -3.73725000 | -1.16365500 |
| C  | -3.04561700 | -4.44523900 | -0.55656500 |
| C  | -1.32661800 | -4.18500700 | -2.33823900 |
| H  | -1.66416500 | -5.10712200 | -2.80960700 |
| C  | -0.28972000 | -3.45603800 | -2.87460300 |
| C  | 0.10303500  | -2.27486900 | -2.23203200 |
| H  | -4.45964000 | -4.51609300 | 1.03560800  |
| H  | -3.69387600 | -0.66661800 | 3.81900900  |
| H  | -4.58419500 | -2.78637200 | 2.83335600  |
| H  | -1.78707800 | 0.47884600  | 2.68608600  |
| H  | -3.39043300 | -5.36625800 | -1.02328700 |
| H  | 0.22093500  | -3.77771600 | -3.77790100 |
| H  | 0.91909800  | -1.67202600 | -2.63330900 |
| N  | -0.47477800 | -1.82139600 | -1.12665200 |
| N  | -1.62764000 | -0.90373600 | 1.17036700  |

### 5a

Charge = 1 Multiplicity = 3

E= -2834.269579

H= -2834.215245

G= -2834.358549

SPE= -2835.1564857

|    |             |             |             |
|----|-------------|-------------|-------------|
| Ni | -2.40087900 | -0.09258000 | -0.22300700 |
| N  | -1.61208300 | 0.35143500  | -2.12155400 |

|   |             |             |             |
|---|-------------|-------------|-------------|
| N | -0.73174100 | -1.35754300 | -0.21945300 |
| N | -3.63627700 | -1.67946800 | -0.89090600 |
| N | -3.13590300 | -0.81994700 | 1.61626300  |
| N | -3.91514000 | 1.39048500  | -0.42974500 |
| N | -1.44488500 | 1.56563900  | 0.61301900  |
| C | -5.13601300 | 1.27688500  | -0.92976500 |
| H | -5.47539300 | 0.26508400  | -1.15591500 |
| C | -5.37527800 | -3.69315300 | 2.32795600  |
| H | -5.81113500 | -4.20217600 | 3.18624800  |
| C | -5.05124900 | -3.46758100 | -0.06748600 |
| C | -5.62836700 | -4.12583600 | 1.06450200  |
| H | -6.27147700 | -4.98734200 | 0.89138700  |
| C | -3.62957700 | 5.06848400  | -0.00698000 |
| H | -4.22075500 | 5.96632800  | -0.18057900 |
| C | -2.84754500 | -0.39896300 | 2.83798800  |
| H | -2.17060500 | 0.45321500  | 2.91030200  |
| C | -2.05551500 | 1.20322200  | -3.03725000 |
| H | -2.99005700 | 1.71952700  | -2.81182700 |
| C | -4.19983600 | 3.80070200  | -0.34314600 |
| C | -2.37912700 | 5.15231400  | 0.52200900  |
| H | -1.95177800 | 6.12015300  | 0.78029500  |
| C | -3.84605800 | -2.09643900 | -2.12946100 |
| H | -3.34933400 | -1.53150200 | -2.91952700 |
| C | -2.12681700 | 2.72166600  | 0.42117000  |
| C | -3.44599100 | 2.62709700  | -0.12987300 |
| C | -0.33576300 | -2.23334000 | 0.69752100  |
| H | -0.95078500 | -2.30701300 | 1.59625900  |
| C | -0.24676000 | 1.61777600  | 1.17077000  |
| H | 0.26578300  | 0.67021600  | 1.34070000  |
| C | -4.52498100 | -2.56636500 | 2.56367000  |
| C | 1.19954400  | -1.94905300 | -1.56405900 |
| C | -0.45396100 | -0.31426200 | -2.35338800 |
| C | -1.59508500 | 3.97895300  | 0.75912100  |
| C | 0.29839500  | -0.13590300 | -3.53323900 |
| C | -3.95481500 | -1.88791900 | 1.46786800  |
| C | -4.21923600 | -2.34733000 | 0.13258600  |
| C | 1.52250200  | -0.85195000 | -3.70519000 |
| H | 2.11066800  | -0.66464100 | -4.60188700 |
| C | 0.00985500  | -1.22699100 | -1.34763700 |
| C | 1.95595500  | -1.72223200 | -2.75784500 |
| H | 2.89773700  | -2.25642500 | -2.86794500 |
| C | 2.64136200  | 2.30427000  | -2.97370500 |
| H | 2.21321500  | 2.87792000  | -3.79731500 |
| C | 1.89115500  | 2.02109900  | -1.83625800 |
| H | 0.85669000  | 2.37696100  | -1.75249300 |
| C | 2.46455700  | 1.30328800  | -0.78884600 |
| H | 1.86373300  | 1.09386100  | 0.09429500  |
| C | 3.79637000  | 0.86650400  | -0.78745000 |
| C | 4.52135200  | 1.17297700  | -1.95415900 |
| H | 5.57579500  | 0.89386700  | -2.00437300 |
| C | 3.96291300  | 1.86344700  | -3.02730300 |
| H | 4.57457200  | 2.08762400  | -3.90181600 |
| C | 6.00278900  | 0.63288000  | 0.72927100  |
| C | 7.03643000  | -0.18879600 | 1.19994500  |
| H | 6.84112200  | -1.25079500 | 1.36071300  |
| C | 8.31374400  | 0.29823100  | 1.46792300  |
| H | 9.08680600  | -0.37999600 | 1.83026200  |
| C | 8.60639100  | 1.64335200  | 1.27099800  |
| H | 9.60482800  | 2.02850300  | 1.47586800  |
| C | 6.33436200  | 1.98556200  | 0.54022700  |
| H | 5.56712700  | 2.67055400  | 0.16914600  |
| C | 1.97813000  | 1.00565700  | 4.14778100  |
| H | 1.38906300  | 1.22284200  | 5.03884200  |
| C | 4.54883600  | -1.53494000 | 0.19445800  |
| C | 3.86481900  | 1.47920000  | 2.70508400  |
| H | 4.74479500  | 2.09013600  | 2.49917200  |
| C | 3.09087100  | 1.78107100  | 3.82503800  |
| H | 3.37286200  | 2.61725600  | 4.46581300  |
| C | 3.57652300  | 0.40338000  | 1.84720900  |
| C | 2.43915000  | -0.34434800 | 2.19900000  |
| H | 2.16422800  | -1.19283500 | 1.57020900  |
| C | 5.02097700  | -3.38788200 | -1.35318400 |
| H | 5.27332400  | -3.71592100 | -2.36323300 |
| C | 4.85275200  | -2.03045600 | -1.08523700 |
| H | 4.97541800  | -1.32159400 | -1.90721200 |

|   |             |             |             |
|---|-------------|-------------|-------------|
| C | 4.45345600  | -2.50956700 | 1.20418800  |
| H | 4.26560400  | -2.18800800 | 2.23033700  |
| C | 1.65874100  | -0.06992700 | 3.32306100  |
| H | 0.80128400  | -0.70953700 | 3.55884800  |
| C | 7.60478300  | 2.48959200  | 0.80451100  |
| H | 7.81543500  | 3.54717000  | 0.64161800  |
| C | 4.60953200  | -3.87334000 | 0.95696800  |
| H | 4.53491400  | -4.58537500 | 1.77999900  |
| C | 4.88454000  | -4.32625900 | -0.33122500 |
| H | 5.02074300  | -5.38871600 | -0.53026800 |
| B | 4.47562700  | 0.08325800  | 0.49743000  |
| C | -5.26242700 | -3.88294600 | -1.39700900 |
| H | -5.89844300 | -4.74528100 | -1.59379800 |
| C | -4.65888600 | -3.20012200 | -2.42958700 |
| H | -4.79872400 | -3.50175700 | -3.46410300 |
| C | -4.20517800 | -2.09212100 | 3.85141000  |
| H | -4.62252800 | -2.59155000 | 4.72500500  |
| C | -3.36370900 | -1.01106600 | 3.99066000  |
| H | -3.09124500 | -0.62899500 | 4.97066900  |
| C | -0.20262300 | 0.76916100  | -4.48575300 |
| H | 0.35958800  | 0.93920000  | -5.40346500 |
| C | -1.38027400 | 1.44110100  | -4.24074900 |
| H | -1.78730100 | 2.15010500  | -4.95672800 |
| C | 1.59638900  | -2.86779000 | -0.57261700 |
| H | 2.51568300  | -3.44304100 | -0.69916500 |
| C | 0.81057900  | -3.02143500 | 0.55130000  |
| H | 1.10341000  | -3.70847100 | 1.34183200  |
| C | 0.36884200  | 2.82542700  | 1.55031300  |
| H | 1.36291900  | 2.78829500  | 1.99598700  |
| C | -0.30311200 | 4.00434200  | 1.32996000  |
| H | 0.14526900  | 4.96084400  | 1.59594300  |
| C | -5.48983600 | 3.64471300  | -0.88544700 |
| H | -6.10348900 | 4.52619400  | -1.06862200 |
| C | -5.96272100 | 2.38300400  | -1.17486000 |
| H | -6.95621800 | 2.23368100  | -1.58905000 |

**5b**

Charge = 1 Multiplicity = 1  
E= -2863.518041  
H= -2863.463660  
G= -2863.605973  
SPE= -2867.6831552

|   |             |             |             |
|---|-------------|-------------|-------------|
| N | 1.80262900  | 0.93216400  | 2.00629900  |
| N | 0.86694000  | -1.31907000 | 0.78430300  |
| N | 3.96653400  | -1.30761300 | 0.76719200  |
| N | 2.82548400  | -1.20323700 | -1.70123200 |
| N | 3.84498100  | 1.72082000  | -0.20557300 |
| N | 1.29441200  | 1.58721300  | -1.15234000 |
| C | 5.09746500  | 1.76959300  | 0.22499400  |
| H | 5.52806300  | 0.82778300  | 0.56631400  |
| C | 4.98460500  | -4.20561400 | -2.06794600 |
| H | 5.22649400  | -4.95055800 | -2.82429300 |
| C | 5.23185100  | -3.28399300 | 0.15990000  |
| C | 5.55739100  | -4.25504700 | -0.83782000 |
| H | 6.26868800  | -5.03983400 | -0.58571600 |
| C | 3.28112100  | 5.27978200  | -1.11406700 |
| H | 3.82096800  | 6.22508600  | -1.09614800 |
| C | 2.23770000  | -1.16653300 | -2.88881800 |
| H | 1.51320600  | -0.36823900 | -3.05363700 |
| C | 2.25578600  | 2.03100000  | 2.60058300  |
| H | 3.11184900  | 2.51977200  | 2.13205000  |
| C | 3.94441000  | 4.10590000  | -0.64394400 |
| C | 2.00703400  | 5.21229500  | -1.57948200 |
| H | 1.50060500  | 6.10484700  | -1.94370800 |
| C | 4.49004600  | -1.36675800 | 1.98257400  |
| H | 4.16951500  | -0.59310000 | 2.68309200  |
| C | 1.91572600  | 2.79842200  | -1.13981600 |
| C | 3.26569200  | 2.86580800  | -0.64915300 |
| C | 0.47550700  | -2.47114400 | 0.25327400  |
| H | 0.99062400  | -2.78579300 | -0.65628600 |
| C | 0.07525700  | 1.51540000  | -1.67208600 |
| H | -0.39475100 | 0.53045900  | -1.71056900 |
| C | 4.04345200  | -3.18092800 | -2.39956100 |

|   |             |             |             |
|---|-------------|-------------|-------------|
| C | -0.83764200 | -1.58845900 | 2.48868400  |
| C | 0.73809100  | 0.29481800  | 2.55747300  |
| C | 1.29841600  | 3.97157500  | -1.61397800 |
| C | 0.09825300  | 0.76118100  | 3.72722500  |
| C | 3.71534100  | -2.19559200 | -1.44669200 |
| C | 4.31872300  | -2.25024500 | -0.13955400 |
| C | -1.03421300 | 0.06471400  | 4.24896200  |
| H | -1.52920800 | 0.46845900  | 5.13031700  |
| C | 0.25004200  | -0.89841400 | 1.91922400  |
| C | -1.48577500 | -1.06621600 | 3.65142600  |
| H | -2.35641200 | -1.59880600 | 4.02932500  |
| C | -2.29120800 | 3.12150800  | 2.14135600  |
| H | -1.86810000 | 3.94713800  | 2.71478900  |
| C | -1.47763300 | 2.30565200  | 1.36406800  |
| H | -0.39959100 | 2.49518700  | 1.31567200  |
| C | -2.03553000 | 1.25447200  | 0.63726400  |
| H | -1.37272700 | 0.59185600  | 0.07744600  |
| C | -3.41254000 | 1.00496500  | 0.58306000  |
| C | -4.20051900 | 1.84148000  | 1.39363300  |
| H | -5.28152100 | 1.69165400  | 1.40218600  |
| C | -3.66040300 | 2.86509300  | 2.16731900  |
| H | -4.31790700 | 3.48542900  | 2.77657800  |
| C | -5.55305100 | 0.23701200  | -0.86459300 |
| C | -6.61222100 | -0.67154700 | -0.99275100 |
| H | -6.47060600 | -1.70399500 | -0.66913400 |
| C | -7.85168300 | -0.30627000 | -1.51266600 |
| H | -8.64577800 | -1.04924300 | -1.58957500 |
| C | -8.08103600 | 1.00024100  | -1.92774700 |
| H | -9.04984900 | 1.29121500  | -2.33201200 |
| C | -5.82375400 | 1.55006600  | -1.28812900 |
| H | -5.04060200 | 2.30765200  | -1.19330800 |
| C | -1.36937900 | -0.84249300 | -3.91405500 |
| H | -0.74124500 | -1.01119400 | -4.79208500 |
| C | -4.19371000 | -1.56001400 | 0.58349400  |
| C | -3.21939900 | 0.29471000  | -2.84334100 |
| H | -4.02766200 | 1.02423100  | -2.91996900 |
| C | -2.38230800 | 0.11461800  | -3.94343700 |
| H | -2.53944300 | 0.70937000  | -4.84404200 |
| C | -3.09182600 | -0.44855700 | -1.65578100 |
| C | -2.05469700 | -1.39627500 | -1.66580800 |
| H | -1.92702900 | -2.01863100 | -0.78282800 |
| C | -4.63647000 | -2.62914500 | 2.75153300  |
| H | -4.82581200 | -2.52146800 | 3.82155700  |
| C | -4.40411700 | -1.49749600 | 1.97065200  |
| H | -4.40256500 | -0.51944800 | 2.45756100  |
| C | -4.23597700 | -2.85239200 | 0.02890900  |
| H | -4.11751000 | -2.96549500 | -1.05101000 |
| C | -1.21719600 | -1.60925400 | -2.76148600 |
| H | -0.46028500 | -2.39944900 | -2.72307100 |
| C | -7.05493500 | 1.93259500  | -1.81154700 |
| H | -7.21660900 | 2.96464500  | -2.12433800 |
| C | -4.44965600 | -3.99749200 | 0.79376400  |
| H | -4.48520500 | -4.97430200 | 0.31011400  |
| C | -4.64943900 | -3.89436500 | 2.16874100  |
| H | -4.84000800 | -4.78231400 | 2.77058300  |
| B | -4.06316000 | -0.20054800 | -0.33527100 |
| C | 5.77777700  | -3.30939500 | 1.45756600  |
| H | 6.48604300  | -4.09338000 | 1.72297700  |
| C | 5.40614700  | -2.35282800 | 2.37464300  |
| H | 5.80432100  | -2.35209600 | 3.38548500  |
| C | 3.40063800  | -3.11161800 | -3.65180800 |
| H | 3.62584400  | -3.86120500 | -4.40946800 |
| C | 2.49453900  | -2.10751500 | -3.89761600 |
| H | 1.97319800  | -2.03196700 | -4.84811500 |
| C | 0.60740500  | 1.92650800  | 4.32406800  |
| H | 0.12827900  | 2.31705100  | 5.22104500  |
| C | 1.69152200  | 2.56456300  | 3.76404100  |
| H | 2.10670000  | 3.46828400  | 4.20157900  |
| C | -1.25227100 | -2.78514000 | 1.87348600  |
| H | -2.12029800 | -3.32103000 | 2.26247500  |
| C | -0.55983000 | -3.25077800 | 0.77883300  |
| H | -0.85590900 | -4.16984000 | 0.27886700  |
| C | -0.62302700 | 2.63431300  | -2.16083300 |
| H | -1.63218500 | 2.48857200  | -2.53875500 |
| C | -0.01491100 | 3.86178500  | -2.12014300 |

|    |             |            |             |
|----|-------------|------------|-------------|
| H  | -0.52577000 | 4.75502300 | -2.47721500 |
| C  | 5.26826300  | 4.11857900 | -0.16675700 |
| H  | 5.81835700  | 5.05882200 | -0.14833300 |
| C  | 5.85286500  | 2.94879800 | 0.26262500  |
| H  | 6.87592300  | 2.92650500 | 0.62766400  |
| Mg | 2.37638300  | 0.07229600 | 0.03651600  |

**8a**

Charge = 1 Multiplicity = 1  
 E= -2263.233458  
 H= -2263.190153  
 G= -2263.307857  
 SPE= -3603.9523627

|    |             |             |             |
|----|-------------|-------------|-------------|
| Ni | 0.97373800  | 0.16907100  | -0.33524200 |
| N  | 0.47869600  | 1.94142500  | -0.97440100 |
| N  | 1.68227700  | 1.18325500  | 1.24268600  |
| N  | 3.03316400  | 0.03915200  | -1.41079700 |
| N  | 1.62393900  | -1.44269600 | 0.40775000  |
| C  | 3.69549700  | 0.75860300  | -2.29749500 |
| H  | 3.20892100  | 1.67436500  | -2.64062100 |
| C  | 5.40132500  | -2.76615300 | -0.84223700 |
| H  | 6.37895500  | -3.10078500 | -1.18739800 |
| C  | -0.02827500 | 2.32269500  | -2.14278900 |
| H  | -0.15816700 | 1.56091300  | -2.90853200 |
| C  | 4.86095400  | -1.55626800 | -1.38009800 |
| C  | 4.71236200  | -3.47837500 | 0.08891000  |
| H  | 5.12722100  | -4.39497900 | 0.50670900  |
| C  | 2.85793200  | -1.87224700 | 0.01286300  |
| C  | 3.59390500  | -1.10211500 | -0.95146200 |
| C  | 2.33912700  | 0.76936300  | 2.31726200  |
| H  | 2.59408800  | -0.28783300 | 2.36954500  |
| C  | 0.95670000  | -2.11438300 | 1.34141600  |
| H  | -0.00817400 | -1.70807800 | 1.64475600  |
| C  | 1.64676500  | 3.43450700  | 2.16431000  |
| C  | 0.69956600  | 2.90523000  | -0.03733700 |
| C  | 3.42635500  | -3.04704200 | 0.54637800  |
| C  | 0.35244500  | 4.25548000  | -0.21938300 |
| C  | 0.62619700  | 5.18857600  | 0.83153000  |
| H  | 0.33273500  | 6.22778100  | 0.68904500  |
| C  | 1.35134900  | 2.49604500  | 1.15777200  |
| C  | 1.24893700  | 4.79641100  | 1.97677000  |
| H  | 1.46251300  | 5.51511000  | 2.76678000  |
| C  | 0.61376900  | -2.90739800 | -2.20785600 |
| H  | 1.35124000  | -3.47605400 | -2.77321400 |
| C  | -0.24782300 | -3.55245700 | -1.30578600 |
| H  | -0.16713100 | -4.63268900 | -1.17435000 |
| C  | -1.22106800 | -2.85318200 | -0.59956000 |
| H  | -1.89310300 | -3.40833600 | 0.05738200  |
| C  | -1.42097400 | -1.47012800 | -0.76448200 |
| C  | -0.49327700 | -0.82363500 | -1.63301800 |
| H  | -0.82323300 | 0.13890500  | -2.00742300 |
| C  | 0.47237100  | -1.54620000 | -2.38818400 |
| H  | 1.08726500  | -1.01599800 | -3.11811700 |
| C  | -4.06108300 | -1.49908800 | -0.19237800 |
| C  | -5.14079000 | -1.19652700 | 0.65434500  |
| H  | -4.99401800 | -0.47588700 | 1.46367800  |
| C  | -6.39539600 | -1.77730300 | 0.49701200  |
| H  | -7.20504500 | -1.51474700 | 1.17821700  |
| C  | -6.61908400 | -2.68957300 | -0.53369100 |
| H  | -7.59902600 | -3.14759700 | -0.66283100 |
| C  | -4.32230000 | -2.40992600 | -1.22553400 |
| H  | -3.52992200 | -2.67155900 | -1.93244100 |
| C  | -1.16305800 | -0.80268200 | 4.23318000  |
| H  | -0.79222900 | 0.84696800  | 5.25678800  |
| C  | -2.94347300 | 0.79198000  | -0.67186600 |
| C  | -2.46961900 | -1.74205700 | 2.42656100  |
| H  | -3.12453400 | -2.53908900 | 2.06881300  |
| C  | -1.97107400 | -1.82135200 | 3.72615700  |
| H  | -2.23264900 | -2.67279500 | 4.35518300  |
| C  | -2.18039600 | -0.66435100 | 1.56715500  |
| C  | -1.35924400 | 0.33686800  | 2.11046000  |
| H  | -1.10086200 | 1.19940100  | 1.49236100  |
| C  | -3.52213100 | 2.08380700  | -2.68794300 |

|   |             |             |             |
|---|-------------|-------------|-------------|
| H | -3.68776300 | 2.10063500  | -3.76637700 |
| C | -3.13888600 | 0.89849300  | -2.06408100 |
| H | -3.03950000 | 0.00119800  | -2.68210000 |
| C | -3.18973900 | 1.96550400  | 0.05919100  |
| H | -3.12153900 | 1.94338400  | 1.14843700  |
| C | -0.86821300 | 0.28639300  | 3.41676600  |
| H | -0.26189700 | 1.10878200  | 3.80355500  |
| C | -5.57521200 | -3.00059400 | -1.39891500 |
| H | -5.73487300 | -3.70432200 | -2.21639200 |
| C | -3.57555800 | 3.16361200  | -0.54785300 |
| H | -3.77860000 | 4.03971400  | 0.07023900  |
| C | -3.73584000 | 3.23432400  | -1.92891700 |
| H | -4.05967000 | 4.16073100  | -2.40399800 |
| B | -2.65587900 | -0.68307600 | -0.00929000 |
| C | -0.23484000 | 4.61066500  | -1.44890500 |
| H | -0.54193900 | 5.64084900  | -1.62614200 |
| C | -0.40026700 | 3.64654400  | -2.41607300 |
| H | -0.83925900 | 3.87920400  | -3.38250000 |
| C | 2.33932900  | 2.96209900  | 3.29644000  |
| H | 2.59128500  | 3.65120700  | 4.10200300  |
| C | 2.69391700  | 1.63271900  | 3.36514300  |
| H | 3.23274100  | 1.23459300  | 4.22117500  |
| C | 1.46896700  | -3.27883900 | 1.93311300  |
| H | 0.87578000  | -3.78173300 | 2.69343600  |
| C | 2.69452500  | -3.75104700 | 1.52671100  |
| H | 3.11682900  | -4.65934400 | 1.95649000  |
| C | 5.53952600  | -0.76721200 | -2.33158600 |
| H | 6.51849100  | -1.08510400 | -2.68986500 |
| C | 4.95974700  | 0.39323900  | -2.79360000 |
| H | 5.45960100  | 1.02240300  | -3.52620500 |

**8b**

Charge = 1 Multiplicity = 1  
 E= -2292.442117  
 H= -2292.398368  
 G= -2292.518403  
 SPE= -2295.7555332

|   |             |             |             |
|---|-------------|-------------|-------------|
| N | -0.98759400 | 1.36769700  | 1.53120400  |
| N | -0.81117800 | 2.21530400  | -1.04587300 |
| N | -1.91771800 | -1.63218200 | 0.68021700  |
| N | -3.19649200 | 0.15791800  | -0.92367600 |
| C | -0.86298500 | 1.78684000  | 3.88887700  |
| H | -0.89281300 | 1.37650400  | 4.89424200  |
| C | -0.66085400 | 3.12979300  | 3.66439400  |
| H | -0.52667400 | 3.82146000  | 4.49512600  |
| C | -0.62925700 | 3.62088400  | 2.34659300  |
| C | -0.44467800 | 5.00625100  | 2.04176100  |
| H | -0.33368400 | 5.70708800  | 2.86751500  |
| C | -0.41096600 | 5.43736000  | 0.75547600  |
| H | -0.27343300 | 6.49243000  | 0.52453900  |
| C | -0.53798100 | 4.51438200  | -0.32935800 |
| C | -0.71133000 | 3.13994600  | -0.06286400 |
| C | -0.77850900 | 2.68732200  | 1.30168800  |
| C | -0.48434100 | 4.91258000  | -1.67616600 |
| H | -0.35603000 | 5.96709400  | -1.91717900 |
| C | -0.57402700 | 3.96485400  | -2.67109400 |
| H | -0.51822100 | 4.23664600  | -3.72138900 |
| C | -1.85820100 | -3.73089700 | 1.84697600  |
| H | -1.28300600 | -4.40565100 | 2.47503300  |
| C | -3.13081800 | -4.03496800 | 1.43016100  |
| H | -3.61024500 | -4.96974000 | 1.71874500  |
| C | -3.83288200 | -3.12143800 | 0.61853200  |
| C | -5.16504000 | -3.36663100 | 0.16136800  |
| H | -5.64725900 | -4.29881000 | 0.45132600  |
| C | -5.81671000 | -2.45873000 | -0.60880700 |
| H | -6.83385700 | -2.64292600 | -0.95032200 |
| C | -5.17919900 | -1.23863400 | -0.99226100 |
| C | -3.85935400 | -0.97203900 | -0.56921500 |
| C | -3.17694400 | -1.92472100 | 0.26524900  |
| C | -5.81363600 | -0.26869700 | -1.79082400 |
| H | -6.83330600 | -0.44275400 | -2.13232100 |
| C | -5.14151400 | 0.88333400  | -2.12758900 |
| H | -5.60506800 | 1.65292900  | -2.73824400 |

|    |             |             |             |
|----|-------------|-------------|-------------|
| B  | 2.52746300  | -0.82929000 | -0.19677500 |
| C  | 1.17753100  | -1.43367100 | -0.94257600 |
| C  | 0.84139000  | -2.79692800 | -0.79481100 |
| H  | 1.43465400  | -3.39982500 | -0.10373400 |
| C  | -0.93781300 | -2.67456100 | -2.43476000 |
| H  | -1.72504600 | -3.15668500 | -3.01190700 |
| C  | 0.39109200  | -0.72726300 | -1.87852000 |
| H  | 0.69105400  | 0.29410100  | -2.12893400 |
| C  | 3.80975100  | -1.26573200 | -1.11748400 |
| C  | 3.74828200  | -2.02931600 | -2.28828400 |
| H  | 2.78408400  | -2.39317500 | -2.65217600 |
| C  | 6.13689800  | -1.91255100 | -2.60631700 |
| H  | 7.03036800  | -2.16166300 | -3.17701100 |
| C  | 5.08770100  | -0.83114900 | -0.72560000 |
| H  | 5.18047400  | -0.22408700 | 0.17868600  |
| C  | 2.60758400  | -1.52160400 | 1.28958000  |
| C  | 1.70488000  | -1.18375700 | 2.30766900  |
| H  | 0.98697700  | -0.38012200 | 2.12118500  |
| C  | 2.59046600  | -2.82841500 | 3.82588300  |
| H  | 2.59419700  | -3.32340100 | 4.79575300  |
| C  | 3.50285400  | -2.55491000 | 1.60181300  |
| H  | 4.22949100  | -2.86595300 | 0.85027900  |
| C  | 2.51852200  | 0.81822700  | -0.15235500 |
| C  | 2.64808600  | 1.53409800  | -1.35998700 |
| H  | 2.76487900  | 0.97119000  | -2.28961700 |
| C  | 2.66557800  | 3.66874500  | -0.23877400 |
| H  | 2.73951400  | 4.75642700  | -0.26875100 |
| C  | 2.50084700  | 1.60622500  | 1.01035500  |
| H  | 2.47147000  | 1.12146400  | 1.98694000  |
| C  | -1.03704900 | 0.94206000  | 2.78747100  |
| H  | -1.21541100 | -0.12406700 | 2.93191800  |
| C  | -0.72633400 | 2.62294600  | -2.30640800 |
| H  | -0.76437300 | 1.84782800  | -3.07341900 |
| C  | -3.82766100 | 1.05153400  | -1.67343500 |
| H  | -3.26666200 | 1.94985900  | -1.93077300 |
| C  | -1.28461000 | -2.51635000 | 1.44296100  |
| H  | -0.26917200 | -2.26354700 | 1.75586000  |
| C  | -0.17215300 | -3.40597200 | -1.52296000 |
| H  | -0.37002300 | -4.46956900 | -1.38650800 |
| C  | -0.64373400 | -1.33170600 | -2.62057600 |
| H  | -1.19144500 | -0.75142300 | -3.36711300 |
| C  | 1.68575400  | -1.80720700 | 3.55409200  |
| H  | 0.97003500  | -1.48939900 | 4.31667900  |
| C  | 3.49831600  | -3.19752400 | 2.83830600  |
| H  | 4.21520200  | -3.99456800 | 3.03310700  |
| C  | 6.23218300  | -1.14771400 | -1.44511000 |
| H  | 7.20469400  | -0.79399100 | -1.10348800 |
| C  | 4.88848800  | -2.35011900 | -3.02617300 |
| H  | 4.79610900  | -2.94686700 | -3.93362600 |
| C  | 2.70796600  | 2.92211900  | -1.41488000 |
| H  | 2.82610200  | 3.42370300  | -2.37633900 |
| C  | 2.57835100  | 2.99918900  | 0.97616700  |
| H  | 2.59571700  | 3.56201200  | 1.91104900  |
| Mg | -1.09753100 | 0.16748900  | -0.26723700 |

### TS8a-11a

Charge = 1 Multiplicity = 1

E= -2263.216110

H= -2263.172980

G= -2263.289940

SPE= -3603.931177

Imaginary frequency = -153.63

|    |             |             |             |
|----|-------------|-------------|-------------|
| Ni | 0.61718600  | 0.32882400  | 0.39866400  |
| N  | -0.09968800 | 2.11981500  | -0.04095500 |
| N  | 1.21643900  | 1.26971600  | 2.07677400  |
| N  | 2.80330300  | 0.53942900  | -0.66746600 |
| N  | 1.53301000  | -1.22998700 | 1.02053000  |
| C  | 3.36436600  | 1.35267400  | -1.54153900 |
| H  | 2.86655400  | 2.31249000  | -1.69979400 |
| C  | 5.17595100  | -2.31829900 | -0.73510500 |
| H  | 6.10302900  | -2.60391400 | -1.23148100 |
| C  | -0.64725700 | 2.59545600  | -1.15208700 |

|   |             |             |             |
|---|-------------|-------------|-------------|
| H | -0.72043600 | 1.92918000  | -2.00001800 |
| C | 4.58236800  | -1.05968900 | -1.06544800 |
| C | 4.60672600  | -3.13225400 | 0.19221800  |
| H | 5.06868600  | -4.08205800 | 0.45938800  |
| C | 2.74390300  | -1.55560700 | 0.49303800  |
| C | 3.38098500  | -0.65737600 | -0.43727400 |
| C | 1.93950200  | 0.82834100  | 3.09737400  |
| H | 2.38382900  | -0.16033400 | 3.00170700  |
| C | 0.97496400  | -2.01795600 | 1.93480500  |
| H | 0.01021300  | -1.69880700 | 2.32648100  |
| C | 0.83037600  | 3.34021800  | 3.29692900  |
| C | -0.01430000 | 2.97789700  | 1.01745600  |
| C | 3.37889800  | -2.77155000 | 0.83319800  |
| C | -0.53565700 | 4.28440500  | 1.00623200  |
| C | -0.40829400 | 5.09742900  | 2.17773800  |
| H | -0.83812600 | 6.09823700  | 2.15942500  |
| C | 0.68431000  | 2.51319700  | 2.16540200  |
| C | 0.24371500  | 4.64443000  | 3.28271500  |
| H | 0.34518800  | 5.27248300  | 4.16676500  |
| C | 1.25691600  | -2.56032400 | -2.87096900 |
| H | 1.85112900  | -3.17861000 | -3.54336600 |
| C | 0.66532900  | -3.11869200 | -1.73643300 |
| H | 0.76918500  | -4.18359400 | -1.52843000 |
| C | -0.07006400 | -2.31379100 | -0.88102200 |
| H | -0.52982100 | -2.79108500 | -0.01453600 |
| C | -0.28847600 | -0.92014700 | -1.08433200 |
| C | 0.30658400  | -0.42860800 | -2.27385800 |
| H | 0.22142600  | 0.62206200  | -2.54228200 |
| C | 1.06097100  | -1.21034700 | -3.14702100 |
| H | 1.50405600  | -0.75941700 | -4.03503700 |
| C | -2.99178900 | -1.90570800 | -1.43576800 |
| C | -4.29706500 | -2.21916800 | -1.01307200 |
| H | -4.69333100 | -1.74821400 | -0.10982100 |
| C | -5.11374000 | -3.10441800 | -1.71002600 |
| H | -6.11509000 | -3.32302300 | -1.33939100 |
| C | -4.65516600 | -3.70338600 | -2.88166000 |
| H | -5.28876100 | -4.39680000 | -3.43303200 |
| C | -2.57256900 | -2.50469300 | -2.63003100 |
| H | -1.59006300 | -2.26915400 | -3.04115400 |
| C | -2.14004800 | -1.50680100 | 3.82610800  |
| H | -2.12768300 | -1.69371200 | 4.89930000  |
| C | -2.87452300 | 0.63433300  | -1.12199300 |
| C | -2.45430200 | -2.28252700 | 1.55676700  |
| H | -2.69815200 | -3.10652400 | 0.88397000  |
| C | -2.42296200 | -2.53493100 | 2.92962200  |
| H | -2.63404100 | -3.53871400 | 3.29889600  |
| C | -2.20989500 | -1.00831600 | 1.01218000  |
| C | -1.93573900 | 0.00351600  | 1.95102700  |
| H | -1.76510400 | 1.02096900  | 1.59893300  |
| C | -3.58376800 | 2.00010300  | -3.03655400 |
| H | -3.57395000 | 2.17356900  | -4.11298300 |
| C | -2.88769600 | 0.92169400  | -2.50203600 |
| H | -2.35430500 | 0.25558600  | -3.18514100 |
| C | -3.65233900 | 1.47929400  | -0.31406200 |
| H | -3.74564200 | 1.27313200  | 0.75258800  |
| C | -1.89726400 | -0.22763100 | 3.32573700  |
| H | -1.69301200 | 0.59835800  | 4.01014000  |
| C | -3.38075000 | -3.39109900 | -3.34284900 |
| H | -3.01039300 | -3.83513500 | -4.26702700 |
| C | -4.36675300 | 2.55993700  | -0.83655500 |
| H | -4.97426100 | 3.17588800  | -0.17288800 |
| C | -4.32827600 | 2.83417600  | -2.19965700 |
| H | -4.89687900 | 3.66670700  | -2.61319900 |
| B | -2.22597100 | -0.74996100 | -0.59312800 |
| C | -1.13430300 | 4.73624000  | -0.18689200 |
| H | -1.55313700 | 5.74085300  | -0.23702800 |
| C | -1.16152700 | 3.89743900  | -1.27245900 |
| H | -1.60577300 | 4.19538200  | -2.21844400 |
| C | 1.57670000  | 2.82743600  | 4.37482700  |
| H | 1.71132300  | 3.42870300  | 5.27356200  |
| C | 2.14198700  | 1.57616900  | 4.26666900  |
| H | 2.74135000  | 1.15459700  | 5.06961000  |
| C | 1.56641600  | -3.21224800 | 2.35924700  |
| H | 1.05851700  | -3.81928800 | 3.10512600  |
| C | 2.75870400  | -3.60013400 | 1.78858500  |

|   |            |             |             |
|---|------------|-------------|-------------|
| H | 3.23318200 | -4.54165100 | 2.06531100  |
| C | 5.15037300 | -0.17089600 | -1.99996600 |
| H | 6.07110200 | -0.44973400 | -2.51244400 |
| C | 4.53825300 | 1.03743700  | -2.24851700 |
| H | 4.95269300 | 1.74541700  | -2.96258000 |

**TS8b-11b**

Charge = 1 Multiplicity = 1

E= -2292.413115

H= -2292.369247

G= -2292.489735

SPE= -2295.7243764

Imaginary frequency = -159.29

|   |             |             |             |
|---|-------------|-------------|-------------|
| N | 2.38753800  | 0.49896700  | 1.33869200  |
| N | 2.65747300  | -0.43189500 | -1.21016900 |
| N | -0.34991300 | 2.08229700  | 0.92155500  |
| N | 0.51905500  | 1.98255800  | -1.66086100 |
| C | 3.31071700  | 0.91754400  | 3.52331100  |
| H | 3.14600800  | 1.31709900  | 4.52002600  |
| C | 4.51107700  | 0.35685300  | 3.15934400  |
| H | 5.33986900  | 0.29166600  | 3.86324700  |
| C | 4.67216100  | -0.14593200 | 1.85638200  |
| C | 5.89012400  | -0.75769200 | 1.42744300  |
| H | 6.71580800  | -0.81745900 | 2.13457900  |
| C | 6.00598500  | -1.26480000 | 0.17527000  |
| H | 6.92708600  | -1.74605200 | -0.14970400 |
| C | 4.91887300  | -1.18436800 | -0.74814800 |
| C | 3.71268200  | -0.55374300 | -0.37080300 |
| C | 3.57680200  | -0.04441700 | 0.96849000  |
| C | 4.99586100  | -1.72660600 | -2.04445300 |
| H | 5.91166300  | -2.22305000 | -2.36284800 |
| C | 3.90857800  | -1.63450600 | -2.87760500 |
| H | 3.91780500  | -2.06011800 | -3.87717100 |
| C | -1.37449900 | 3.28109700  | 2.74106600  |
| H | -1.73065500 | 3.24551500  | 3.76693200  |
| C | -1.46104700 | 4.42495800  | 1.98544700  |
| H | -1.88315500 | 5.34256500  | 2.39357300  |
| C | -1.03041500 | 4.39784500  | 0.64786000  |
| C | -1.17735600 | 5.52424400  | -0.21916900 |
| H | -1.61330600 | 6.43558200  | 0.18721500  |
| C | -0.80502000 | 5.45243200  | -1.52109800 |
| H | -0.93464200 | 6.30272200  | -2.18861500 |
| C | -0.23223500 | 4.25423000  | -2.04920500 |
| C | -0.03516000 | 3.13511400  | -1.21105600 |
| C | -0.46616100 | 3.19753800  | 0.16118500  |
| C | 0.13832900  | 4.13293500  | -3.40020700 |
| H | -0.01029500 | 4.97731300  | -4.07224300 |
| C | 0.67591600  | 2.95142700  | -3.85365200 |
| H | 0.96634200  | 2.81886000  | -4.89193300 |
| B | -2.24473700 | -1.36364100 | 0.33724400  |
| C | -2.72481300 | 0.10156400  | -0.08617900 |
| C | -3.41554700 | 0.89480800  | 0.84431000  |
| H | -3.55555700 | 0.51840900  | 1.85967400  |
| C | -3.76230200 | 2.65917700  | -0.76704400 |
| H | -4.16137000 | 3.63901500  | -1.02746900 |
| C | -2.59822600 | 0.63858900  | -1.37816700 |
| H | -2.11332300 | 0.05142900  | -2.15656700 |
| C | -2.85740200 | -2.59527000 | -0.44402600 |
| C | -3.76905600 | -2.43552900 | -1.49754000 |
| H | -4.09214200 | -1.43287200 | -1.77928000 |
| C | -3.90075900 | -4.81548800 | -1.84448700 |
| H | -4.29974300 | -5.67145900 | -2.38681700 |
| C | -2.51048700 | -3.91208300 | -0.09883300 |
| H | -1.81227100 | -4.07752800 | 0.72325400  |
| C | -1.95476100 | -1.57574900 | 1.89207600  |
| C | -0.80966900 | -1.18408400 | 2.59582300  |
| H | 0.04650500  | -0.78488900 | 2.04393500  |
| C | -1.74845300 | -1.83742800 | 4.71486400  |
| H | -1.66804400 | -1.94486700 | 5.79505500  |
| C | -2.99405100 | -2.11810200 | 2.66590600  |
| H | -3.90337400 | -2.45388400 | 2.16515600  |
| C | -0.07868800 | -1.65117600 | -0.60350500 |

|    |             |             |             |
|----|-------------|-------------|-------------|
| C  | -0.28260100 | -1.92860600 | -1.97390500 |
| H  | -0.83895700 | -1.22287400 | -2.59709800 |
| C  | 0.85236300  | -4.04878000 | -1.86627800 |
| H  | 1.18769800  | -4.97003300 | -2.34053600 |
| C  | 0.64278000  | -2.65148200 | 0.08541700  |
| H  | 0.83392100  | -2.53949200 | 1.15661200  |
| C  | 2.27978200  | 0.96205400  | 2.57822400  |
| H  | 1.32170900  | 1.39745900  | 2.85239200  |
| C  | 2.76172000  | -0.97664300 | -2.41250200 |
| H  | 1.87367000  | -0.93715800 | -3.04241400 |
| C  | 0.85539200  | 1.90595600  | -2.94137800 |
| H  | 1.29775100  | 0.96866100  | -3.27138100 |
| C  | -0.83262300 | 2.12861400  | 2.15829700  |
| H  | -0.81224200 | 1.19538000  | 2.72387900  |
| C  | -3.93316400 | 2.14468500  | 0.51481200  |
| H  | -4.47309300 | 2.72141000  | 1.26593600  |
| C  | -3.09082300 | 1.89504100  | -1.71687500 |
| H  | -2.96180800 | 2.27155900  | -2.73287000 |
| C  | -0.69283700 | -1.31140700 | 3.97733500  |
| H  | 0.23067600  | -1.01192800 | 4.47577000  |
| C  | -2.90183500 | -2.23935900 | 4.04983600  |
| H  | -3.73435900 | -2.66124700 | 4.61077800  |
| C  | -3.01299000 | -5.00680200 | -0.78836100 |
| H  | -2.71531300 | -6.01464500 | -0.50179800 |
| C  | -4.28466200 | -3.52530800 | -2.19180400 |
| H  | -4.99427400 | -3.36681600 | -3.00290500 |
| C  | 0.14571700  | -3.09734600 | -2.59684400 |
| H  | -0.08136800 | -3.27324700 | -3.64842600 |
| C  | 1.11016200  | -3.81608600 | -0.51869700 |
| H  | 1.65509000  | -4.55564000 | 0.06776400  |
| Mg | 0.69817000  | 0.35482000  | -0.18264300 |

**11a**

Charge = 1 Multiplicity = 1

E= -2263.275533

H= -2263.230938

G= -2263.355200

SPE= -3603.987167

|    |             |             |             |
|----|-------------|-------------|-------------|
| Ni | -1.10890300 | -0.03510100 | 0.04977100  |
| N  | -0.17470600 | 1.48415500  | 0.79684700  |
| N  | -1.97336100 | 1.35484700  | -1.12412600 |
| N  | -3.24469400 | -0.08657600 | 1.29529700  |
| N  | -2.04388200 | -1.49004900 | -0.76391600 |
| C  | -3.80047300 | 0.56838500  | 2.29603400  |
| H  | -3.25426500 | 1.44055800  | 2.66495300  |
| C  | -5.75341900 | -2.76600800 | 0.72685700  |
| H  | -6.70794000 | -3.09370600 | 1.13784300  |
| C  | 0.76584300  | 1.52302400  | 1.73317000  |
| H  | 1.08462700  | 0.56770800  | 2.14275100  |
| C  | -5.11354900 | -1.62591800 | 1.30682800  |
| C  | -5.18719800 | -3.42026500 | -0.31979800 |
| H  | -5.67660200 | -4.28335200 | -0.76969400 |
| C  | -3.25482000 | -1.89143800 | -0.28986400 |
| C  | -3.87148100 | -1.17327500 | 0.80257600  |
| C  | -2.85807100 | 1.23740900  | -2.10208100 |
| H  | -3.16977200 | 0.22440600  | -2.36139200 |
| C  | -1.50108600 | -2.12904300 | -1.79617200 |
| H  | -0.52973500 | -1.76313100 | -2.12951200 |
| C  | -2.02982300 | 3.77075000  | -1.39567500 |
| C  | -0.58554700 | 2.66720500  | 0.26087000  |
| C  | -3.92963600 | -2.99787300 | -0.85753800 |
| C  | -0.08407800 | 3.91642100  | 0.66612400  |
| C  | -0.58547800 | 5.10084800  | 0.03442800  |
| H  | -0.19642700 | 6.06476000  | 0.36153500  |
| C  | -1.56122500 | 2.59623400  | -0.77635800 |
| C  | -1.51840700 | 5.03357900  | -0.95553400 |
| H  | -1.88822400 | 5.94125500  | -1.43142800 |
| C  | 1.18242400  | -3.23288100 | 2.65287000  |
| H  | 1.70374900  | -3.97645600 | 3.25409000  |
| C  | 1.49190700  | -3.07547900 | 1.30400900  |
| H  | 2.26715300  | -3.68764600 | 0.84053000  |
| C  | 0.82028500  | -2.11991500 | 0.53766100  |
| H  | 1.10001400  | -2.01201300 | -0.51380700 |



|   |             |             |             |
|---|-------------|-------------|-------------|
| C | -0.17481000 | -1.30964500 | 1.09396200  |
| C | -0.47768900 | -1.48339800 | 2.44978400  |
| H | -1.24778600 | -0.86716500 | 2.92014600  |
| C | 0.19813100  | -2.42863000 | 3.22510600  |
| H | -0.05407400 | -2.54267000 | 4.27971700  |
| C | 4.23691500  | -1.51177500 | -1.07178700 |
| C | 4.33879200  | -1.83551800 | -2.43951000 |
| H | 3.97629900  | -1.12972600 | -3.18747400 |
| C | 4.93315700  | -3.01800400 | -2.86778700 |
| H | 5.01627200  | -3.23213900 | -3.93250300 |
| C | 5.42982000  | -3.92342400 | -1.93227800 |
| H | 5.89202300  | -4.85240000 | -2.26370800 |
| C | 4.78532600  | -2.42992600 | -0.15487400 |
| H | 4.76258700  | -2.19778600 | 0.91064900  |
| C | 0.81600900  | 2.13854500  | -3.08159400 |
| H | 0.13732000  | 2.71313800  | -3.71321300 |
| C | 4.04841700  | 0.41571800  | 0.81674900  |
| C | 1.74358700  | 0.02345100  | -2.38839900 |
| H | 1.77379700  | -1.06360800 | -2.48852500 |
| C | 0.84996700  | 0.74823800  | -3.17161000 |
| H | 0.18970300  | 0.23202400  | -3.87057900 |
| C | 2.61124100  | 0.65050100  | -1.47357300 |
| C | 2.52069700  | 2.05035700  | -1.37658800 |
| H | 3.15330800  | 2.57807200  | -0.66136200 |
| C | 3.98697200  | 0.39637400  | 3.25788700  |
| H | 3.61665000  | -0.05471700 | 4.17922700  |
| C | 3.59468100  | -0.13099100 | 2.02855900  |
| H | 2.91612500  | -0.98776700 | 2.01420600  |
| C | 4.93355300  | 1.50353500  | 0.89356300  |
| H | 5.33731900  | 1.93826600  | -0.02370000 |
| C | 1.65709400  | 2.78901700  | -2.18145100 |
| H | 1.63842500  | 3.87685700  | -2.10554800 |
| C | 5.35484900  | -3.62706400 | -0.57181800 |
| H | 5.76061100  | -4.32282000 | 0.16149300  |
| C | 5.33922900  | 2.02865300  | 2.11914900  |
| H | 6.03982900  | 2.86264300  | 2.14528700  |
| C | 4.86094300  | 1.48091700  | 3.30809900  |
| H | 5.18184900  | 1.88529000  | 4.26733300  |
| B | 3.61809500  | -0.16682800 | -0.58250500 |
| C | 0.91046300  | 3.92046700  | 1.66520800  |
| H | 1.33553900  | 4.86590700  | 2.00195600  |
| C | 1.33884500  | 2.72207700  | 2.18814600  |
| H | 2.12596600  | 2.67053000  | 2.93850600  |
| C | -2.97392500 | 3.61366800  | -2.42913200 |
| H | -3.36722300 | 4.49250900  | -2.93988000 |
| C | -3.38396300 | 2.34570400  | -2.78492600 |
| H | -4.10811300 | 2.19064500  | -3.58103500 |
| C | -2.11759900 | -3.21397800 | -2.42824300 |
| H | -1.62657500 | -3.69740400 | -3.26888600 |
| C | -3.32986600 | -3.65561500 | -1.94742400 |
| H | -3.83441900 | -4.50995000 | -2.39817500 |
| C | -5.67866500 | -0.90651000 | 2.37871800  |
| H | -6.63177400 | -1.23169200 | 2.79580400  |
| C | -5.02300200 | 0.19428100  | 2.88190200  |
| H | -5.43294700 | 0.76906400  | 3.70917600  |

### 11b

Charge = 1 Multiplicity = 1  
E= -2292.431399  
H= -2292.386425  
G= -2292.511922  
SPE= -2295.7393169

|   |            |             |             |
|---|------------|-------------|-------------|
| N | 3.13869700 | -0.58210100 | 1.25036300  |
| N | 2.10264400 | -1.85788800 | -0.93660700 |
| N | 0.85865800 | 1.95628600  | 0.94355100  |
| N | 2.34577400 | 1.29727200  | -1.21772300 |
| C | 4.72399200 | -0.44849800 | 3.04373900  |
| H | 5.09519600 | 0.10902500  | 3.89907200  |
| C | 5.28715600 | -1.64575800 | 2.66740300  |
| H | 6.12444300 | -2.06938900 | 3.22073700  |
| C | 4.77420400 | -2.34122800 | 1.55665500  |
| C | 5.30091600 | -3.59888500 | 1.12603700  |
| H | 6.13732000 | -4.02612100 | 1.67691900  |

|   |             |             |             |
|---|-------------|-------------|-------------|
| C | 4.76240100  | -4.25091300 | 0.06459100  |
| H | 5.15553200  | -5.21456400 | -0.25548400 |
| C | 3.66244600  | -3.69146300 | -0.65778000 |
| C | 3.13275300  | -2.44020000 | -0.27579100 |
| C | 3.69052500  | -1.75854400 | 0.86559800  |
| C | 3.06708000  | -4.34163200 | -1.75503600 |
| H | 3.45011500  | -5.31073000 | -2.07251100 |
| C | 2.00803000  | -3.75156900 | -2.40536500 |
| H | 1.52070800  | -4.23293600 | -3.24864500 |
| C | -0.32219000 | 3.57283700  | 2.26188200  |
| H | -1.00824300 | 3.75608200  | 3.08423900  |
| C | 0.19556900  | 4.60348100  | 1.51285700  |
| H | -0.06155400 | 5.63957900  | 1.73061900  |
| C | 1.06345900  | 4.31818700  | 0.44077000  |
| C | 1.62995000  | 5.33164500  | -0.39458000 |
| H | 1.40367100  | 6.37344100  | -0.17234600 |
| C | 2.42877500  | 5.00411300  | -1.44297100 |
| H | 2.85969100  | 5.77699100  | -2.07753100 |
| C | 2.71002200  | 3.63575800  | -1.75065600 |
| C | 2.16608300  | 2.61171600  | -0.94693700 |
| C | 1.34900800  | 2.96230700  | 0.18430700  |
| C | 3.49543200  | 3.24553400  | -2.85172300 |
| H | 3.93520400  | 4.00920900  | -3.49231700 |
| C | 3.68988400  | 1.90752800  | -3.10855300 |
| H | 4.28884300  | 1.57387900  | -3.95142000 |
| B | -3.65018200 | 0.01939100  | -0.57322300 |
| C | -2.42295900 | 0.66239600  | -1.31978100 |
| C | -2.13722800 | 2.02794900  | -1.16191400 |
| H | -2.72593700 | 2.61025400  | -0.45156000 |
| C | -0.39299200 | 1.92963100  | -2.82218000 |
| H | 0.36757700  | 2.42343100  | -3.42799000 |
| C | -1.62867300 | -0.05509800 | -2.23256300 |
| H | -1.83236800 | -1.11632800 | -2.38760800 |
| C | -4.48588700 | -1.10841900 | -1.24884400 |
| C | -4.57813900 | -1.25200400 | -2.64458700 |
| H | -4.06002300 | -0.54150500 | -3.28971800 |
| C | -6.01828900 | -3.16632800 | -2.41481000 |
| H | -6.61175700 | -3.96025800 | -2.86553300 |
| C | -5.19867500 | -2.02938200 | -0.45890100 |
| H | -5.15325100 | -1.93792700 | 0.62704700  |
| C | -4.08612700 | 0.58440400  | 0.81574900  |
| C | -3.14266500 | 0.80462600  | 1.83042500  |
| H | -2.10471300 | 0.52719500  | 1.64104000  |
| C | -4.85130900 | 1.59291700  | 3.33151400  |
| H | -5.15046900 | 1.97548600  | 4.30622600  |
| C | -5.42817200 | 0.87836400  | 1.10369700  |
| H | -6.18850100 | 0.70270600  | 0.34172000  |
| C | -0.20146400 | -1.19610000 | 1.25614700  |
| C | -1.22997000 | -2.00467200 | 0.73789900  |
| H | -1.34113200 | -2.11456500 | -0.34713500 |
| C | -2.06121200 | -2.58450400 | 2.92735500  |
| H | -2.77587300 | -3.10645100 | 3.56181500  |
| C | -0.14583600 | -1.14729800 | 2.66342000  |
| H | 0.64490000  | -0.56429600 | 3.15726800  |
| C | 3.64113400  | 0.04405300  | 2.30359100  |
| H | 3.15889900  | 0.98225800  | 2.58247900  |
| C | 1.55845400  | -2.50181500 | -1.95819500 |
| H | 0.71964200  | -2.00403300 | -2.44870300 |
| C | 3.08675600  | 0.96529700  | -2.26381700 |
| H | 3.20415500  | -0.10257700 | -2.45061400 |
| C | 0.04715500  | 2.25629100  | 1.94735200  |
| H | -0.33292100 | 1.41054700  | 2.52313200  |
| C | -1.15246100 | 2.66235400  | -1.91638000 |
| H | -0.98672900 | 3.73509800  | -1.80986200 |
| C | -0.61652300 | 0.56012000  | -2.96279000 |
| H | -0.03069900 | -0.01262300 | -3.68416100 |
| C | -3.51783100 | 1.27942900  | 3.08059400  |
| H | -2.77202600 | 1.38578700  | 3.87051800  |
| C | -5.80566000 | 1.39830200  | 2.33710500  |
| H | -6.85025000 | 1.63634300  | 2.53082100  |
| C | -5.94240600 | -3.05418900 | -1.02900800 |
| H | -6.47394400 | -3.76158800 | -0.39473300 |
| C | -5.34195300 | -2.25764300 | -3.22374100 |
| H | -5.41335600 | -2.33415400 | -4.30751400 |
| C | -2.14108400 | -2.68800000 | 1.54162400  |

H -2.92137300 -3.29646800 1.08209800  
C -1.05166800 -1.81278600 3.49145700  
H -0.96720500 -1.73357100 4.57583200  
Mg 1.28400600 -0.10442000 0.18697000

**9a**

Charge = 1 Multiplicity = 3  
E= -1544.270792  
H= -1544.242592  
G= -1544.331869  
SPE = -2883.790866

C 0.73296700 2.37084500 -0.37037800  
C 0.07945900 3.40465600 -1.06164300  
C 1.95160200 2.69591800 0.24315300  
C 0.61644900 4.69212500 -1.14698100  
H -0.87887300 3.21406100 -1.55641400  
C 2.49046600 3.98121800 0.18392800  
H 2.50678900 1.93065800 0.79578600  
C 1.82344200 4.98444800 -0.51771900  
H 0.08808500 5.46802300 -1.70177400  
H 3.43411400 4.20202600 0.68368200  
H 2.24235600 5.98842500 -0.57181100  
C -2.89044400 0.08685300 0.06868700  
C -2.29006000 2.11550500 0.99177600  
C -4.22845300 0.21709900 0.49237800  
C -2.48299400 -1.08047200 -0.66375000  
C -3.59743800 2.33430000 1.45752600  
H -1.49177200 2.84130800 1.15711400  
C -4.56485400 1.38534300 1.20639000  
C -5.16626200 -0.82067600 0.18672700  
C -3.42955700 -2.08687300 -0.94761000  
H -3.82850700 3.24588300 2.00300700  
H -5.58913500 1.52667200 1.55114600  
C -4.78181500 -1.92806900 -0.50379800  
H -6.19730800 -0.70478100 0.51907300  
C -2.97844300 -3.21038100 -1.66847600  
C -0.79512900 -2.22626000 -1.72874700  
H -5.49944900 -2.71473900 -0.73405700  
H -3.67824200 -4.01011100 -1.91029900  
C -1.65914000 -3.28244700 -2.05898200  
H 0.25436700 -2.25318700 -2.02551600  
H -1.28055500 -4.13524900 -2.61697200  
N -1.94975300 1.02514400 0.32054100  
N -1.18846000 -1.15605900 -1.05567600  
C 2.45454600 -0.99209500 -0.18299800  
C 2.33867700 -0.15863500 -2.32894400  
C 3.71924400 -1.57350600 -0.40801200  
C 1.85263400 -1.07263900 1.11837500  
C 3.59465900 -0.69771600 -2.65044200  
H 1.77201600 0.42626700 -3.05515100  
C 4.27978500 -1.41322400 -1.69102600  
C 4.36751000 -2.27428200 0.65960800  
C 2.52060400 -1.75773000 2.15399000  
H 4.01046500 -0.54258500 -3.64287100  
H 5.25621300 -1.84574200 -1.90835500  
C 3.78903500 -2.36745600 1.88758600  
H 5.34034700 -2.72654700 0.46986600  
C 1.89688900 -1.78366700 3.41664600  
C 0.10920600 -0.47410000 2.50386300  
H 4.29022100 -2.89671200 2.69724800  
H 2.37922900 -2.30407000 4.24376000  
C 0.69027000 -1.14113300 3.59306200  
H -0.83776600 0.05596000 2.61188000  
H 0.18880500 -1.13619100 4.55755400  
N 0.66710400 -0.44239300 1.30350400  
N 1.77832500 -0.31941700 -1.14094700  
Ni -0.01032300 0.53778600 -0.39157100

**9b**

Charge = 1 Multiplicity = 1  
E= -1573.431884

H= -1573.403745  
G= -1573.492107  
SPE= -1575.5518212

C 0.31147800 2.51415400 -0.35593400  
C -0.71717100 3.47456500 -0.38813000  
C 1.61673800 3.03727000 -0.42974000  
C -0.47514500 4.84293200 -0.49259200  
H -1.76312700 3.15059700 -0.33544400  
C 1.88449700 4.40166500 -0.52137200  
H 2.47819200 2.35742700 -0.41054500  
C 0.83302700 5.31151100 -0.55694500  
H -1.30715800 5.54687600 -0.52393100  
H 2.91398900 4.75786800 -0.56681500  
H 1.03183800 6.37955200 -0.63431800  
C -2.94253600 -0.25553300 0.35961400  
C -2.27789300 1.28615900 1.93813700  
C -4.27178900 -0.25074100 0.82923900  
C -2.59386200 -1.06094400 -0.78121600  
C -3.57179800 1.36450600 2.47370800  
H -1.46665900 1.90042500 2.33261500  
C -4.56526200 0.58769900 1.92216200  
C -5.25088300 -1.07398200 0.18967500  
C -3.58416800 -1.86062600 -1.38837500  
H -3.77283500 2.03329100 3.30592900  
H -5.58181000 0.61945700 2.31253600  
C -4.91853500 -1.85189600 -0.87243700  
H -6.27026900 -1.06084500 0.57209500  
C -3.20013100 -2.63457500 -2.49953000  
C -0.99163000 -1.74838800 -2.28569500  
H -5.66502000 -2.47789400 -1.35860200  
H -3.93897700 -3.26497500 -2.99284600  
C -1.90072900 -2.58325300 -2.94866300  
H 0.04376600 -1.68366400 -2.62004000  
H -1.57308900 -3.16864800 -3.80313500  
N -1.96689800 0.48868000 0.92685500  
N -1.31737200 -1.00493800 -1.23782200  
C 2.74117400 -0.79480200 -0.29346400  
C 2.25205200 0.09376700 -2.36065500  
C 4.07500800 -1.06589900 -0.66276300  
C 2.30458800 -1.08092500 1.04891600  
C 3.55823700 -0.12665600 -2.81937800  
H 1.51110100 0.57976400 -2.99800900  
C 4.46617500 -0.71636800 -1.96941600  
C 4.96359300 -1.66649500 0.28328400  
C 3.20664200 -1.67518700 1.95591700  
H 3.83595800 0.17130500 -3.82648300  
H 5.48994100 -0.90708700 -2.28910000  
C 4.54360200 -1.96721100 1.53875800  
H 5.98641300 -1.87554800 -0.02605200  
C 2.73686500 -1.94290900 3.25539100  
C 0.62976200 -1.00864500 2.62888300  
H 5.22131900 -2.42521600 2.25738900  
C 3.40605000 -2.40404100 3.98079900  
C 1.44413100 -1.61523200 3.59387900  
H -0.39449100 -0.72327100 2.86985600  
H 1.05270500 -1.80819300 4.58871600  
N 1.03709000 -0.74506100 1.39560800  
N 1.84679400 -0.24607400 -1.14646700  
Mg -0.02261300 0.43756800 -0.14578000

**12a**

Charge = 1 Multiplicity = 1  
E= -1620.650006  
H= -1620.618879  
G= -1620.711910  
SPE= -2960.273601

H -5.26934600 -2.30535500 1.86181400  
C -4.49140100 -1.87577600 1.23123800  
C -3.23069100 -1.55217300 1.82426000  
C -4.71035700 -1.66123300 -0.09201300  
C -2.19872700 -0.98975500 1.03666000  
C -2.95364300 -1.78006100 3.18705300

|    |             |             |             |
|----|-------------|-------------|-------------|
| C  | -3.69431500 | -1.09014000 | -0.92296500 |
| H  | -5.66627300 | -1.91681800 | -0.54790200 |
| N  | -0.98187100 | -0.69788700 | 1.53860600  |
| C  | -2.44757000 | -0.72940300 | -0.36255800 |
| C  | -1.71218200 | -1.46511000 | 3.69223700  |
| H  | -3.72793800 | -2.20578900 | 3.82527800  |
| C  | -3.89079400 | -0.86943200 | -2.29938000 |
| C  | -0.75192100 | -0.92651600 | 2.81742000  |
| N  | -1.47522900 | -0.15757300 | -1.12228000 |
| H  | -1.46862700 | -1.62818400 | 4.73956200  |
| C  | -2.87804400 | -0.32169000 | -3.05442800 |
| H  | -4.84510700 | -1.13875100 | -2.75165800 |
| H  | 0.24631000  | -0.67091100 | 3.18183700  |
| C  | -1.67919600 | 0.03206600  | -2.42346400 |
| H  | -2.99471500 | -0.14577100 | -4.12072300 |
| H  | -0.84990300 | 0.47573800  | -2.97590600 |
| C  | 3.55104800  | 2.39997200  | 1.34563500  |
| C  | 4.49594400  | 1.39888300  | 1.29640800  |
| C  | 4.14413100  | 0.14739500  | 0.75347500  |
| C  | 2.82418100  | -0.00469900 | 0.29109800  |
| C  | 2.25746200  | 2.16042700  | 0.85591200  |
| C  | 5.04806000  | -0.95920300 | 0.64604200  |
| C  | 2.40813400  | -1.24677900 | -0.27409800 |
| C  | 3.31367200  | -2.31868900 | -0.37835600 |
| C  | 4.65134400  | -2.14226000 | 0.10139000  |
| C  | 2.82987500  | -3.50757800 | -0.95984800 |
| H  | 3.49261500  | -4.36614700 | -1.06512900 |
| C  | 1.52160900  | -3.56606100 | -1.38982500 |
| C  | 0.69580200  | -2.44025600 | -1.23510600 |
| H  | 6.06736500  | -0.83163900 | 1.00881500  |
| H  | 3.78720300  | 3.37906300  | 1.75477200  |
| H  | 5.50744400  | 1.56249300  | 1.66741800  |
| H  | 1.49428700  | 2.93719100  | 0.87961800  |
| H  | 5.34828000  | -2.97570200 | 0.02110300  |
| H  | 1.11873500  | -4.46752900 | -1.84483200 |
| H  | -0.34398000 | -2.46170000 | -1.56388200 |
| N  | 1.12269700  | -1.31250100 | -0.69157200 |
| N  | 1.89267700  | 0.98962200  | 0.33982600  |
| C  | -0.59024800 | 2.13404300  | -0.13011700 |
| C  | -0.58312000 | 3.04628400  | -1.19068200 |
| H  | -0.22744400 | 2.74442500  | -2.17996100 |
| C  | -1.51328600 | 4.77294100  | 0.22383500  |
| H  | -1.86497100 | 5.79407700  | 0.36256200  |
| C  | -1.09376300 | 2.55871300  | 1.10440600  |
| H  | -1.11750100 | 1.87030300  | 1.95187100  |
| C  | -1.03214200 | 4.35781400  | -1.01560900 |
| H  | -1.00898000 | 5.05494900  | -1.85337100 |
| C  | -1.54991900 | 3.86666300  | 1.28166100  |
| H  | -1.93470600 | 4.17817100  | 2.25296000  |
| O  | 1.45407200  | 0.82307500  | -3.11273400 |
| H  | 1.91718600  | 0.96927400  | -3.94970200 |
| H  | 1.70981400  | 1.56411700  | -2.54391500 |
| Ni | 0.16607600  | 0.41707000  | -0.33651900 |

## 12b

Charge = 1 Multiplicity = 1  
 E= -1649.818048  
 H= -1649.787062  
 G= -1649.880431  
 SPE= -1652.042514

|   |             |             |             |
|---|-------------|-------------|-------------|
| H | -4.03232800 | -2.97571700 | 3.03201400  |
| C | -3.59458500 | -2.50205200 | 2.15462300  |
| C | -2.36783900 | -1.78342800 | 2.31085100  |
| C | -4.20522900 | -2.58301700 | 0.94511000  |
| C | -1.77253300 | -1.15955000 | 1.19344900  |
| C | -1.71398800 | -1.65403200 | 3.55038000  |
| C | -3.63548300 | -1.95607900 | -0.20706400 |
| H | -5.14413200 | -3.12254200 | 0.83038100  |
| N | -0.62169900 | -0.45172800 | 1.28188500  |
| C | -2.41675200 | -1.25381200 | -0.09254300 |
| C | -0.54599700 | -0.93217200 | 3.63101300  |
| H | -2.14580600 | -2.12337200 | 4.43358300  |
| C | -4.24203400 | -1.99792400 | -1.47662100 |

|    |             |             |             |
|----|-------------|-------------|-------------|
| C  | -0.03810000 | -0.34344300 | 2.46457400  |
| N  | -1.82955000 | -0.64152400 | -1.14686600 |
| H  | -0.02088200 | -0.80756200 | 4.57397800  |
| C  | -3.64271200 | -1.36263400 | -2.53972100 |
| H  | -5.18487900 | -2.52962200 | -1.60008100 |
| H  | 0.88019300  | 0.24476400  | 2.49872000  |
| C  | -2.43033300 | -0.69116800 | -2.32670600 |
| H  | -4.09070300 | -1.37019800 | -3.52954300 |
| H  | -1.92292700 | -0.17216900 | -3.14058200 |
| C  | 3.49536000  | 2.50823700  | 1.43997500  |
| C  | 4.47599700  | 1.54762300  | 1.34557500  |
| C  | 4.21317100  | 0.34495700  | 0.65994900  |
| C  | 2.92841800  | 0.19092200  | 0.10032800  |
| C  | 2.24720900  | 2.26452200  | 0.84489500  |
| C  | 5.17900500  | -0.69981300 | 0.51204400  |
| C  | 2.60161700  | -1.01943300 | -0.60795000 |
| C  | 3.58093300  | -2.02622600 | -0.74270900 |
| C  | 4.87555700  | -1.83811600 | -0.16390000 |
| C  | 3.22200900  | -3.18415500 | -1.45868600 |
| H  | 3.95226600  | -3.98269700 | -1.58498200 |
| C  | 1.95795000  | -3.28976800 | -1.99116300 |
| C  | 1.05399800  | -2.23485500 | -1.79607600 |
| H  | 6.16590100  | -0.56023600 | 0.95067700  |
| H  | 3.67032700  | 3.44534500  | 1.96129900  |
| H  | 5.45730100  | 1.70320900  | 1.79278200  |
| H  | 1.43683400  | 2.99551500  | 0.88911300  |
| H  | 5.61432700  | -2.62977900 | -0.27927700 |
| H  | 1.65208300  | -4.16820500 | -2.55277400 |
| H  | 0.04289600  | -2.28883400 | -2.20202900 |
| N  | 1.35614700  | -1.13459900 | -1.12594800 |
| N  | 1.97205600  | 1.14263600  | 0.19534700  |
| C  | -0.99101200 | 2.54851700  | -0.39242900 |
| C  | -0.41622400 | 3.74604900  | -0.86885800 |
| H  | 0.58538600  | 3.72407900  | -1.32492700 |
| C  | -2.29240300 | 5.09257400  | -0.18971400 |
| H  | -2.78989200 | 6.05801600  | -0.11020800 |
| C  | -2.26397000 | 2.71026600  | 0.18983300  |
| H  | -2.79002800 | 1.83255700  | 0.58399300  |
| C  | -1.03840300 | 4.99363600  | -0.77841300 |
| H  | -0.54403800 | 5.88567400  | -1.16423900 |
| C  | -2.90607800 | 3.94102000  | 0.29822700  |
| H  | -3.89048500 | 4.00802200  | 0.76241200  |
| Mg | -0.04961200 | 0.61302600  | -0.62563000 |
| O  | 0.12562000  | 1.17994600  | -2.73955700 |
| H  | 0.92067100  | 1.31234300  | -3.27375300 |
| H  | -0.27568400 | 2.06214800  | -2.60310200 |

## TS12a-13a

Charge = 1 Multiplicity = 1  
 E= -1620.598950  
 H= -1620.569380  
 G= -1620.658633  
 SPE= -2960.219635  
 Imaginary frequency = -1555.56

|   |             |             |             |
|---|-------------|-------------|-------------|
| H | -4.55744600 | -0.93950200 | 3.19639900  |
| C | -4.02838000 | -0.93758900 | 2.24410600  |
| C | -2.62851300 | -0.63862700 | 2.24645500  |
| C | -4.68471600 | -1.19355900 | 1.08260200  |
| C | -1.91451200 | -0.60875000 | 1.02671700  |
| C | -1.92640800 | -0.35142300 | 3.43211400  |
| C | -3.98089600 | -1.22232000 | -0.16217600 |
| H | -5.75481400 | -1.39915400 | 1.08184900  |
| N | -0.61066600 | -0.22086700 | 0.98596600  |
| C | -2.59021000 | -0.97163700 | -0.19610300 |
| C | -0.58488400 | -0.04524100 | 3.37498800  |
| H | -2.45534800 | -0.37672600 | 4.38464900  |
| C | -4.61526300 | -1.50622800 | -1.38873900 |
| C | 0.03187000  | 0.03012900  | 2.12148900  |
| N | -1.86320600 | -1.05934600 | -1.32867600 |
| H | -0.01014400 | 0.16861000  | 4.27241400  |
| C | -3.87084200 | -1.55406400 | -2.54641500 |
| H | -5.68968000 | -1.68963100 | -1.40455000 |

|    |             |             |             |
|----|-------------|-------------|-------------|
| H  | 1.07213200  | 0.34044400  | 2.02156200  |
| C  | -2.48318200 | -1.34021000 | -2.46001500 |
| H  | -4.33207400 | -1.76882000 | -3.50765700 |
| H  | -1.85513500 | -1.39503400 | -3.35210900 |
| C  | 4.34124600  | 2.77098700  | 0.65034200  |
| C  | 5.22415900  | 1.72369700  | 0.52745300  |
| C  | 4.74586000  | 0.44256100  | 0.18595700  |
| C  | 3.35112300  | 0.29372100  | -0.01742200 |
| C  | 2.97489700  | 2.51375700  | 0.44613200  |
| C  | 5.62417700  | -0.67578800 | 0.04623200  |
| C  | 2.83416100  | -1.00410200 | -0.40413000 |
| C  | 3.73848100  | -2.08819200 | -0.52656500 |
| C  | 5.13591300  | -1.89623600 | -0.29025700 |
| C  | 3.22853400  | -3.34763700 | -0.89447100 |
| H  | 3.91264900  | -4.19040000 | -0.99164800 |
| C  | 1.88206400  | -3.49519000 | -1.12815600 |
| C  | 1.05551900  | -2.37300600 | -0.99946100 |
| H  | 6.69009900  | -0.52672100 | 0.21557600  |
| H  | 4.67822400  | 3.77353700  | 0.90285800  |
| H  | 6.29295800  | 1.86758800  | 0.68555300  |
| H  | 2.24838500  | 3.32411200  | 0.54187900  |
| H  | 5.79910700  | -2.75398600 | -0.39622400 |
| H  | 1.45265500  | -4.45147500 | -1.41546900 |
| H  | -0.01568200 | -2.43380000 | -1.18958000 |
| N  | 1.50659800  | -1.17258400 | -0.65367900 |
| N  | 2.49036500  | 1.32467300  | 0.13370200  |
| C  | -0.96518700 | 2.01857400  | -0.73748500 |
| C  | -0.83422800 | 2.79285400  | 0.42610300  |
| H  | 0.11458000  | 2.80310400  | 0.96625000  |
| C  | -3.13330800 | 3.49529800  | 0.25919400  |
| H  | -3.97635200 | 4.06182200  | 0.65262300  |
| C  | -2.19661000 | 2.03589600  | -1.41056900 |
| H  | -2.29908900 | 1.47284100  | -2.33989800 |
| C  | -1.90889900 | 3.51690200  | 0.93052200  |
| H  | -1.79814700 | 4.10253900  | 1.84236100  |
| C  | -3.27451000 | 2.76872100  | -0.92227000 |
| H  | -4.22218900 | 2.77714200  | -1.45957200 |
| O  | 0.69324200  | 0.95435900  | -2.37121900 |
| H  | 1.61836900  | 1.24412900  | -2.33980700 |
| H  | -0.01874300 | 1.78283000  | -1.63804200 |
| Ni | 0.19360700  | 0.31017600  | -0.68230600 |

### TS12b-13b

Charge = 1 Multiplicity = 1  
 E= -1649.813161  
 H= -1649.783428  
 G= -1649.873894  
 SPE= -1652.038371  
 Imaginary frequency = -439.54

|   |             |             |             |
|---|-------------|-------------|-------------|
| H | -4.10193700 | -2.40027200 | 3.31283600  |
| C | -3.65321600 | -2.06721300 | 2.37826900  |
| C | -2.43068500 | -1.32713900 | 2.43738400  |
| C | -4.24727400 | -2.33868100 | 1.18788900  |
| C | -1.82125100 | -0.88329100 | 1.24480700  |
| C | -1.79395400 | -1.00231900 | 3.64988900  |
| C | -3.66225500 | -1.89684200 | -0.03986800 |
| H | -5.18333800 | -2.89350300 | 1.14679900  |
| N | -0.67194800 | -0.16481500 | 1.23351800  |
| C | -2.44645400 | -1.18340500 | -0.01711600 |
| C | -0.62739800 | -0.27424900 | 3.63058900  |
| H | -2.23671100 | -1.32824100 | 4.59036800  |
| C | -4.24838700 | -2.13185400 | -1.29907300 |
| C | -0.10320400 | 0.12516900  | 2.39312400  |
| N | -1.84249000 | -0.74083300 | -1.14326400 |
| H | -0.11396700 | -0.00229600 | 4.54864500  |
| C | -3.63367800 | -1.66218800 | -2.43680600 |
| H | -5.18951700 | -2.67788400 | -1.35528300 |
| H | 0.81715900  | 0.70878800  | 2.34853100  |
| C | -2.42241700 | -0.96411200 | -2.31419700 |
| H | -4.06900600 | -1.81849400 | -3.41992800 |
| H | -1.89544000 | -0.56233600 | -3.18057600 |
| C | 3.48129000  | 2.59620400  | 1.09547300  |

|    |             |             |             |
|----|-------------|-------------|-------------|
| C  | 4.45240700  | 1.62324800  | 1.14097100  |
| C  | 4.18285000  | 0.34384200  | 0.61767000  |
| C  | 2.90314400  | 0.12579900  | 0.06586600  |
| C  | 2.24132900  | 2.28904000  | 0.51534100  |
| C  | 5.14313400  | -0.71620900 | 0.62670800  |
| C  | 2.57708700  | -1.17268500 | -0.46552200 |
| C  | 3.55077500  | -2.19302900 | -0.45080900 |
| C  | 4.84102500  | -1.93449200 | 0.10906500  |
| C  | 3.19064600  | -3.43798000 | -1.00132500 |
| H  | 3.91851200  | -4.24848800 | -1.00974400 |
| C  | 1.93027100  | -3.61341300 | -1.52358600 |
| C  | 1.02920700  | -2.53937900 | -1.48254400 |
| H  | 6.12531100  | -0.52132100 | 1.05455100  |
| H  | 3.65759300  | 3.59198100  | 1.49269200  |
| H  | 5.43015600  | 1.82651500  | 1.57653300  |
| H  | 1.44670900  | 3.03537100  | 0.45227900  |
| H  | 5.57607200  | -2.73782400 | 0.11088800  |
| H  | 1.62542900  | -4.56003700 | -1.96097000 |
| H  | 0.02084700  | -2.64201400 | -1.88521000 |
| N  | 1.33475800  | -1.35979200 | -0.96772800 |
| N  | 1.95730800  | 1.09548800  | 0.01104600  |
| C  | -0.98546600 | 2.52227100  | -1.12864000 |
| C  | -0.26233800 | 3.72810400  | -1.20287800 |
| H  | 0.70888400  | 3.73444800  | -1.71343900 |
| C  | -1.97471800 | 4.96530900  | -0.05323900 |
| H  | -2.35573200 | 5.89898100  | 0.35784200  |
| C  | -2.24443700 | 2.61390600  | -0.50750100 |
| H  | -2.88264100 | 1.72599700  | -0.44225500 |
| C  | -0.73315800 | 4.93125800  | -0.68133700 |
| H  | -0.14457800 | 5.84389900  | -0.77461500 |
| C  | -2.73383100 | 3.80193300  | 0.03074900  |
| H  | -3.71375000 | 3.82739900  | 0.50724100  |
| Mg | 0.00676400  | 0.42550700  | -0.84621800 |
| O  | -0.01278100 | 0.80912000  | -2.86580800 |
| H  | 0.67495400  | 1.19143500  | -3.42535900 |
| H  | -0.53161700 | 1.65291300  | -2.30188000 |

### 13a

Charge = 1 Multiplicity = 1  
 E= -1620.660949  
 H= -1620.630767  
 G= -1620.722796  
 SPE= -2960.289138

|   |             |             |             |
|---|-------------|-------------|-------------|
| H | -3.89841100 | -2.05591000 | 3.13742700  |
| C | -3.40246800 | -1.79837000 | 2.20215200  |
| C | -2.18575800 | -1.04177100 | 2.26025700  |
| C | -3.93476000 | -2.18974600 | 1.00945500  |
| C | -1.54314200 | -0.71642400 | 1.05390200  |
| C | -1.57553700 | -0.58702000 | 3.44497200  |
| C | -3.29845000 | -1.85681300 | -0.23125600 |
| H | -4.86051400 | -2.76365500 | 0.98246800  |
| N | -0.38869600 | -0.00723200 | 0.97696600  |
| C | -2.10458400 | -1.12162800 | -0.18738200 |
| C | -0.40671800 | 0.14252800  | 3.36516000  |
| H | -2.02965300 | -0.80979400 | 4.41023400  |
| C | -3.78061200 | -2.19720200 | -1.51177100 |
| C | 0.15878900  | 0.41261200  | 2.10927100  |
| N | -1.42308200 | -0.73782100 | -1.29049400 |
| H | 0.08705000  | 0.51111800  | 4.26091600  |
| C | -3.07976700 | -1.79472700 | -2.63083700 |
| H | -4.70320800 | -2.76948300 | -1.60820500 |
| H | 1.08130000  | 0.98762400  | 2.02514700  |
| H | -1.89118400 | -1.05741800 | -2.48674600 |
| C | -3.43298300 | -2.04025900 | -3.62935500 |
| H | -1.28998200 | -0.69859000 | -3.32351400 |
| C | 2.81542400  | 3.35202900  | -0.19920800 |
| C | 4.00113300  | 2.74863700  | 0.15655800  |
| C | 4.09137200  | 1.34424800  | 0.18922800  |
| C | 2.93680200  | 0.59109200  | -0.13430200 |
| C | 1.72026000  | 2.54026400  | -0.51298400 |
| C | 5.31039500  | 0.67545600  | 0.52784800  |
| C | 3.00773100  | -0.85371000 | -0.11938100 |
| C | 4.23648100  | -1.47363300 | 0.21058200  |

|    |             |             |             |
|----|-------------|-------------|-------------|
| C  | 5.38100800  | -0.68068400 | 0.53635100  |
| C  | 4.27465800  | -2.88279900 | 0.19884200  |
| H  | 5.20563300  | -3.39340600 | 0.44499100  |
| C  | 3.14096900  | -3.59145100 | -0.12639700 |
| C  | 1.96998200  | -2.87470000 | -0.43446300 |
| H  | 6.18158800  | 1.28221300  | 0.77182800  |
| H  | 2.71713700  | 4.43329200  | -0.24902100 |
| H  | 4.87981400  | 3.34394000  | 0.40413600  |
| H  | 0.76733600  | 2.96976700  | -0.81970600 |
| H  | 6.31201000  | -1.18783300 | 0.78820400  |
| H  | 3.13950500  | -4.67874900 | -0.14925000 |
| H  | 1.05224300  | -3.40531200 | -0.69781200 |
| N  | 1.90191500  | -1.55826100 | -0.43032700 |
| N  | 1.77128700  | 1.21146700  | -0.46760500 |
| C  | -3.15473500 | 2.04850400  | -1.40508900 |
| C  | -2.06800700 | 2.75564500  | -0.89286100 |
| H  | -1.30840000 | 3.13019800  | -1.57985300 |
| C  | -2.95702200 | 2.50518600  | 1.33923100  |
| H  | -2.88678200 | 2.69654500  | 2.41001100  |
| C  | -4.14009200 | 1.56761000  | -0.54585900 |
| H  | -4.99565400 | 1.02422800  | -0.94746000 |
| C  | -1.97269300 | 2.98892300  | 0.47801600  |
| H  | -1.13443300 | 3.55850400  | 0.88276000  |
| C  | -4.04000200 | 1.79272900  | 0.82750000  |
| H  | -4.81619100 | 1.42466200  | 1.49829400  |
| O  | 0.37214800  | 0.54019400  | -2.65442200 |
| H  | 1.29608600  | 0.72074000  | -2.87651500 |
| H  | -3.22823200 | 1.87631600  | -2.47870200 |
| Ni | 0.17145600  | 0.23860800  | -0.88879100 |

### 13b

Charge = 1 Multiplicity = 1

E= -1649.857958

H= -1649.827376

G= -1649.919016

SPE= -1652.088447

|   |             |             |             |
|---|-------------|-------------|-------------|
| H | -4.21080500 | -0.88927900 | 3.45232300  |
| C | -3.67711600 | -0.96964200 | 2.50641600  |
| C | -2.46018700 | -0.23258000 | 2.34869200  |
| C | -4.16654800 | -1.73826400 | 1.49881900  |
| C | -1.74572100 | -0.31854100 | 1.13576600  |
| C | -1.93878000 | 0.61039500  | 3.34725400  |
| C | -3.46936700 | -1.84461600 | 0.25408500  |
| H | -5.10120800 | -2.28388100 | 1.62016100  |
| N | -0.61215600 | 0.38414400  | 0.89768800  |
| C | -2.25192900 | -1.15805300 | 0.08227400  |
| C | -0.78544500 | 1.31943100  | 3.10148800  |
| H | -2.45935200 | 0.69795100  | 4.30034000  |
| C | -3.94223700 | -2.59074400 | -0.84424800 |
| C | -0.16052600 | 1.17961700  | 1.85440200  |
| N | -1.54848600 | -1.20327600 | -1.06666400 |
| H | -0.35986200 | 1.98443200  | 3.84800800  |
| C | -3.22741400 | -2.60665300 | -2.02166600 |
| H | -4.88049700 | -3.13736500 | -0.75322900 |
| H | 0.74451300  | 1.74401900  | 1.62596500  |
| C | -2.02274300 | -1.88851200 | -2.09608900 |
| H | -3.58222100 | -3.15821100 | -2.88805900 |
| H | -1.41942000 | -1.82821500 | -3.00377400 |
| C | 3.51019100  | 3.08889400  | -0.32972400 |
| C | 4.53637600  | 2.29804400  | 0.13290100  |
| C | 4.34657600  | 0.90831700  | 0.25254800  |
| C | 3.08623800  | 0.38928800  | -0.11447100 |
| C | 2.29384600  | 2.48019200  | -0.66854600 |
| C | 5.37077200  | 0.02709600  | 0.72156200  |
| C | 2.85521800  | -1.03054500 | -0.01909600 |
| C | 3.89005900  | -1.87152400 | 0.44092700  |
| C | 5.15109000  | -1.30926200 | 0.81297200  |
| C | 3.62267900  | -3.25257500 | 0.50396400  |
| H | 4.40016000  | -3.93083500 | 0.85355800  |
| C | 2.39026300  | -3.72716100 | 0.11951400  |
| C | 1.42672500  | -2.81116600 | -0.32634100 |
| H | 6.33322000  | 0.45364200  | 0.99967500  |
| H | 3.62626500  | 4.16374600  | -0.43730600 |

|    |             |             |             |
|----|-------------|-------------|-------------|
| H  | 5.49801700  | 2.73077500  | 0.40635200  |
| H  | 1.45759400  | 3.07719700  | -1.03442800 |
| H  | 5.93351400  | -1.97918100 | 1.16605800  |
| H  | 2.15644800  | -4.78762000 | 0.15135200  |
| H  | 0.44100800  | -3.15000300 | -0.64728200 |
| N  | 1.64576600  | -1.50824300 | -0.39237000 |
| N  | 2.07970600  | 1.17694300  | -0.56588400 |
| C  | -2.16195100 | 1.88895900  | -2.04654000 |
| C  | -1.27192800 | 2.86709900  | -1.60384100 |
| H  | -0.40799300 | 3.11146900  | -2.22401600 |
| C  | -2.64301000 | 3.25173500  | 0.34206200  |
| H  | -2.83751100 | 3.78891300  | 1.26915100  |
| C  | -3.29921700 | 1.60350000  | -1.29472700 |
| H  | -4.00504500 | 0.84986500  | -1.64519100 |
| C  | -1.51320400 | 3.55214800  | -0.41398500 |
| H  | -0.82855100 | 4.33262900  | -0.08095400 |
| C  | -3.53695100 | 2.27807800  | -0.10022600 |
| H  | -4.42804200 | 2.05158900  | 0.48486200  |
| Mg | 0.25889900  | 0.01496400  | -1.17861800 |
| O  | 0.20687200  | 0.01415400  | -3.03460000 |
| H  | 0.91952700  | 0.21358900  | -3.64475300 |
| H  | -1.93987900 | 1.34725500  | -2.96488200 |

### 10a

Charge = 1 Multiplicity = 1

E= -1388.689301

H= -1388.665556

G= -1388.741810

SPE= -2727.915166

|   |             |             |             |
|---|-------------|-------------|-------------|
| H | -4.79462100 | 2.85387900  | 1.28372500  |
| C | -4.24295500 | 1.99747000  | 0.89805000  |
| C | -2.86376300 | 1.85281300  | 1.26256400  |
| C | -4.85936700 | 1.08756500  | 0.09108900  |
| C | -2.15336500 | 0.74779500  | 0.76385300  |
| C | -2.15222600 | 2.73870700  | 2.09549900  |
| C | -4.15082200 | -0.04757000 | -0.42348300 |
| H | -5.90887400 | 1.21028300  | -0.17378600 |
| N | -0.84679200 | 0.49773800  | 1.03964600  |
| C | -2.79954700 | -0.19691500 | -0.07822100 |
| C | -0.82526200 | 2.48394400  | 2.37513700  |
| H | -2.65262200 | 3.61210900  | 2.51260200  |
| C | -4.70091400 | -1.04530200 | -1.25564600 |
| C | -0.20438200 | 1.35056000  | 1.82695900  |
| N | -2.02932600 | -1.22699300 | -0.50020700 |
| H | -0.25004600 | 3.14681000  | 3.01659600  |
| C | -3.90734200 | -2.09256000 | -1.67649800 |
| H | -5.74640500 | -0.98284500 | -1.55654900 |
| H | 0.84249000  | 1.13141500  | 2.03678700  |
| C | -2.56002600 | -2.15752400 | -1.27861500 |
| H | -4.30874300 | -2.87611200 | -2.31416200 |
| H | -1.87576900 | -2.95485600 | -1.57132700 |
| O | 0.08292900  | -2.69565000 | -0.68905100 |
| H | 1.02962200  | -2.86164500 | -0.79616800 |
| C | 1.80614300  | 1.90386600  | -3.19993500 |
| C | 3.07755800  | 1.92630600  | -2.67453800 |
| C | 3.36040500  | 1.19236400  | -1.50481500 |
| C | 2.29818100  | 0.45853500  | -0.92540600 |
| C | 0.82179300  | 1.14629800  | -2.53880200 |
| C | 4.66046300  | 1.17299600  | -0.90928800 |
| C | 2.55837700  | -0.32205500 | 0.26354500  |
| C | 3.85741100  | -0.31942800 | 0.82590100  |
| C | 4.89873100  | 0.44850700  | 0.21448300  |
| C | 4.08395500  | -1.09321800 | 1.98002500  |
| H | 5.07743100  | -1.10162400 | 2.42801900  |
| C | 3.05891000  | -1.83768700 | 2.52037600  |
| C | 1.80534000  | -1.79930100 | 1.90047600  |
| H | 5.45673200  | 1.75079700  | -1.37771000 |
| H | 1.55697600  | 2.45455600  | -4.10399700 |
| H | 3.87266400  | 2.50046100  | -3.15003500 |
| H | -0.19718700 | 1.10833900  | -2.92934100 |
| H | 5.88858800  | 0.43063600  | 0.66890000  |
| H | 3.20522000  | -2.45597700 | 3.40208600  |
| H | 0.97141600  | -2.39194800 | 2.27422700  |

|    |             |             |             |
|----|-------------|-------------|-------------|
| N  | 1.55926200  | -1.05831000 | 0.82233400  |
| N  | 1.05333100  | 0.45163400  | -1.44212300 |
| Ni | -0.22105000 | -1.11552000 | 0.11102600  |

**10b**

Charge = 1 Multiplicity = 1

E= -1417.883522

H= -1417.858892

G= -1417.938074

SPE= -1419.711461

|   |             |             |             |
|---|-------------|-------------|-------------|
| H | -5.07512800 | 1.98577700  | -2.12915600 |
| C | -4.46016300 | 1.36392600  | -1.48052200 |
| C | -3.12226700 | 1.78841300  | -1.20191600 |
| C | -4.95900800 | 0.22383700  | -0.93644200 |
| C | -2.29958800 | 1.00243200  | -0.36846400 |
| C | -2.57464700 | 2.98047800  | -1.71219000 |
| C | -4.15465300 | -0.59292500 | -0.08115300 |
| H | -5.98344000 | -0.08557800 | -1.13772700 |
| N | -1.03366100 | 1.36172000  | -0.03735300 |
| C | -2.82155400 | -0.22101000 | 0.18121100  |
| C | -1.28637600 | 3.33340700  | -1.38217100 |
| H | -3.18032400 | 3.61298900  | -2.36017500 |
| C | -4.62565200 | -1.76705200 | 0.53900600  |
| C | -0.55278300 | 2.49105900  | -0.53615100 |
| N | -2.00273300 | -0.95167200 | 0.96651400  |
| H | -0.83606400 | 4.24813800  | -1.75737400 |
| C | -3.79501400 | -2.47986800 | 1.37364300  |

|    |             |             |             |
|----|-------------|-------------|-------------|
| H  | -5.65123500 | -2.08925000 | 0.36204500  |
| H  | 0.46785700  | 2.74876600  | -0.25268000 |
| C  | -2.47869700 | -2.03139900 | 1.56627600  |
| H  | -4.14103200 | -3.37444000 | 1.88394300  |
| H  | -1.78755100 | -2.54274900 | 2.23622900  |
| Mg | -0.00790500 | -0.11326100 | 1.31362400  |
| O  | -0.07280300 | -0.55469500 | 3.09215700  |
| O  | 0.57840100  | -0.47296800 | 3.79044100  |
| C  | 1.36837400  | -3.20497000 | -1.65550800 |
| C  | 2.65875300  | -2.80740700 | -1.91901700 |
| C  | 3.17158300  | -1.64914600 | -1.30458400 |
| C  | 2.31370700  | -0.94056500 | -0.43837800 |
| C  | 0.59501600  | -2.43796500 | -0.77348700 |
| C  | 4.50776900  | -1.18487700 | -1.51761500 |
| C  | 2.79922700  | 0.24506500  | 0.22023500  |
| C  | 4.12866000  | 0.66410400  | 0.00407400  |
| C  | 4.96933300  | -0.07518300 | -0.88610200 |
| C  | 4.56546100  | 1.80953700  | 0.69682900  |
| H  | 5.58670100  | 2.16147200  | 0.55557600  |
| C  | 3.70391700  | 2.46354500  | 1.54810200  |
| C  | 2.39912900  | 1.97115700  | 1.69329500  |
| H  | 5.15013900  | -1.74850100 | -2.19231300 |
| H  | 0.94632300  | -4.09660400 | -2.11050500 |
| H  | 3.29400200  | -3.37922800 | -2.59441100 |
| H  | -0.42865400 | -2.72826900 | -0.53543800 |
| H  | 5.99012200  | 0.26999300  | -1.04226900 |
| H  | 4.01620700  | 3.34313700  | 2.10410900  |
| H  | 1.68908800  | 2.45951800  | 2.36295500  |
| N  | 1.95436100  | 0.90511700  | 1.04524600  |
| N  | 1.04470500  | -1.34131700 | -0.18266900 |
